1 Synaptic Mechanisms of Top-Down Control by The Auditory Cortico-Collicular Pathway

2

3 Hannah M. Oberle<sup>1,2</sup>, Alex Ford<sup>1</sup>, Jordyn Czarny<sup>1</sup>, & Pierre F. Apostolides<sup>1,3\*</sup>

4 1) Kresge Hearing Research Institute & Department of Otolaryngology, University of Michigan

5 Medical School

6 2) Neuroscience Graduate Program, University of Michigan

7 3) Molecular and Integrative Physiology, University of Michigan Medical School

8 \*corresponding author: [piaposto@med.umich.edu](mailto:piaposto@med.umich.edu)

9

10 **Abstract**

11 Corticofugal projections to evolutionarily ancient, sub-cortical structures are ubiquitous across  
12 mammalian sensory systems. These “descending” pathways enable the neocortex to control  
13 ascending sensory representations in a predictive or feedback manner, but the underlying cellular  
14 mechanisms are poorly understood. Here we combine optogenetic approaches with *in vivo* and *in*  
15 *vitro* patch-clamp electrophysiology to study the projection from auditory cortex to the inferior  
16 colliculus (IC), a major descending auditory pathway that controls IC neuron feature selectivity,  
17 plasticity and auditory perceptual learning. Although individual auditory cortico-collicular synapses  
18 were generally weak, IC neurons often integrated inputs from multiple corticofugal axons that  
19 generated reliable, tonic depolarizations even during prolonged presynaptic activity. Latency  
20 measurements *in vivo* showed that descending signals reach the IC within 30 ms of sound onset,  
21 which in IC neurons corresponded to the peak of synaptic depolarizations evoked by short sounds.  
22 Activating ascending and descending pathways at latencies expected *in vivo* caused a NMDA  
23 receptor dependent, supra-linear EPSP summation, indicating that descending signals can non-  
24 linearly amplify IC neurons’ moment-to-moment acoustic responses. Our results shed light upon the  
25 synaptic bases of descending sensory control, and imply that heterosynaptic cooperativity  
26 contributes to the auditory cortico-collicular pathway’s role in plasticity and perceptual learning.

27

## 28 Introduction

29 The auditory system is organized as a network of feedback loops, such that most central auditory  
30 nuclei receive descending projections from higher levels of the processing hierarchy (Diamond et  
31 al., 1969; Saldaña et al., 1996; Winer et al., 1998, 2001; Doucet et al., 2003; Coomes and  
32 Schofield, 2004; Schofield et al., 2006; Suthakar and Ryugo, 2017). The auditory cortex is a major  
33 source of excitatory (glutamatergic) descending projections, with the density of descending fibers  
34 often rivaling that of ascending fiber tracts (Winer et al., 2001; Winer, 2006; Stebbings et al., 2014).  
35 These corticofugal projections likely play a major role in hearing by providing an anatomical  
36 substrate for “top-down” information to control early acoustic processing. Indeed, stimulating or  
37 silencing the auditory cortex *in vivo* changes spontaneous and sound-evoked activity throughout  
38 the central auditory system (Massopust and Ordy, 1962; Ryugo and Weinberger, 1976; Yan and  
39 Suga, 1998, 1999; Xiao and Suga, 2002; Yu et al., 2004; Nakamoto et al., 2008, 2010; Anderson  
40 and Malmierca, 2013; Kong et al., 2014; Vila et al., 2019; Blackwell et al., 2020; Qi et al., 2020),  
41 indicating that high-level activity regulates the moment-to-moment function of sub-cortical auditory  
42 circuits. However, little is known regarding the biophysical properties of auditory corticofugal  
43 synapses, nor do we understand how descending signals are integrated with ascending  
44 information. Given that synaptic dynamics and pathway integration are fundamental building blocks  
45 of neural circuit computations (Abbott et al., 1997; Zucker and Regehr, 2002; Stuart and Spruston,  
46 2015), addressing these knowledge gaps is necessary to understand how the auditory cortex  
47 exerts control over early auditory processing.

48  
49 Of particular interest is the descending projection from auditory cortex to the inferior colliculus (IC),  
50 a midbrain hub important for sound localization, speech perception, and an early site of divergence  
51 for primary and higher-order auditory pathways (Masterton et al., 1968; Krishna and Semple, 2000;  
52 Champoux et al., 2007; Sinex and Li, 2007; Joswig et al., 2015). The IC is generally sub-divided  
53 into a “lemniscal” central core and “non-lemniscal” dorsal and lateral shell regions whose neurons  
54 have distinct afferent and efferent connections (Faye-Lund and Osen, 1985; Loftus et al., 2008;  
55 Ayala et al., 2015; Chen et al., 2018). Whereas central IC neurons project mainly to the primary  
56 auditory thalamus (ventral medial geniculate nucleus; Mellott et al., 2014; Oliver, 1984), shell IC  
57 neurons preferentially project to secondary, higher-order auditory thalamic nuclei that subsequently  
58 funnel acoustic information to the amygdala and striatum (Oliver and Hall, 1978; LeDoux et al.,  
59 1990; Bordi and LeDoux, 1994; Mellott et al., 2014; Cai et al., 2019; Ponvert and Jaramillo, 2019).  
60 Auditory cortico-collicular axons terminate primarily in the shell IC, with comparatively fewer fibers  
61 in the central IC (Bajo et al., 2019; Chen et al., 2018; Lesicko et al., 2016; Song et al., 2018; Winer  
62 et al., 1998; Xiong et al., 2015; but see Saldaña et al., 1996). Thus, auditory cortico-collicular  
63 synapses seem uniquely positioned to modulate acoustic signals destined for limbic circuits  
64 supporting learned valence and habit formation; this prediction is further supported by the fact that  
65 chemical ablation of auditory cortico-collicular neurons selectively impairs certain forms of auditory  
66 perceptual learning while sparing the performance of previously learned task associations (Bajo et  
67 al., 2010). Nevertheless, little is known regarding how auditory cortico-collicular synapses control  
68 activity in single IC neurons. Intriguingly, auditory cortex inactivation typically does not abolish IC  
69 neuron sound responses, but rather causes divisive, non-monotonic changes in receptive field  
70 properties and feature selectivity (Yan and Suga, 1999; Nakamoto et al., 2008, 2010; Anderson and

71 Malmierca, 2013). Thus, descending transmission might operate in part via heterosynaptic  
72 interactions, perhaps by controlling how IC neurons respond to ascending acoustic inputs.

73

74 Here we employ electrophysiology and optogenetic approaches to identify how auditory cortico-  
75 collicular synapses transmit descending signals, and to understand how descending synapses  
76 control IC neuron responses to ascending inputs. We find that the majority of shell IC neurons  
77 receive monosynaptic inputs from auditory cortex and often integrate information from multiple  
78 distinct corticofugal axons. Synaptic latency measurements *in vivo* show that descending excitation  
79 reaches IC neurons ~5-7 ms after spike initiation in auditory cortex, such that cortical feedback will  
80 rapidly follow the onset of acoustically driven excitation. Somewhat surprisingly, NMDA receptors  
81 only modestly contribute to descending transmission. By contrast, excitatory intra-collicular  
82 synapses from the central IC, which are probably a major source of ascending acoustic signals to  
83 shell IC neurons, had a much larger NMDA component. Consequently, appropriately timed activity  
84 in ascending and descending pathways integrates supra-linearly owing to the cooperative activation  
85 of NMDA receptors. Our data reveal a key role for heterosynaptic non-linearities in the descending  
86 modulation of early acoustic processing. In addition, the results place important biophysical  
87 constraints on the synaptic learning rules that might support the auditory cortico-collicular  
88 pathway's role in experience-dependent plasticity and perceptual learning.

89

## 90 **Results**

91

### 92 *Auditory cortico-collicular synapses robustly target superficial IC neurons*

93 Corticofugal axons are predominantly restricted to the shell IC (Winer et al., 1998; Song et al.,  
94 2018), but little is known about the extent of functional synaptic connectivity between auditory  
95 cortex and IC neurons. We tested how auditory cortico-collicular synapses impact IC neurons by  
96 transducing the optogenetic activator Chronos in the auditory cortex of mice via intracranial AAV  
97 injections (Figure 1A), and 2-4 weeks later, performing *in vivo* whole-cell recordings from the  
98 ipsilateral IC of urethane anesthetized mice. GFP-tagged, Chronos expressing auditory cortico-  
99 collicular axons were primarily restricted to the ipsilateral dorsal-medial and lateral IC (Figure 1B),  
100 in agreement with previous studies. Single flashes of blue light from an optic fiber positioned over  
101 auditory cortex (1-5 ms duration; Figure 1C) reliably triggered excitatory postsynaptic potentials  
102 (EPSPs) in  $n = 21/38$  IC neurons recorded from  $N = 8$  mice (Figure 1D). EPSPs were primarily  
103 observed in superficial IC neurons, with the majority of unresponsive neurons located more  
104 ventrally, presumably in the central IC (Figure 1E; mean depth of cortico recipient and non-recipient  
105 neurons:  $220 \pm 23$  vs.  $354 \pm 38$   $\mu\text{m}$  from surface,  $p=0.0036$ , Kolmogorov-Smirnov test). EPSPs had  
106 an onset latency of  $10.3 \pm 0.7$  ms following light stimulation (Figure 1F), a peak amplitude of  $3.5 \pm$   
107  $0.7$  mV (Figure 1G), and a full-width at half-maximum of  $18.4 \pm 1.5$  ms (Figure 1H). Interestingly,  
108 EPSP amplitudes varied over 2 orders of magnitude across different cells and were occasionally  
109 large enough to drive IC neurons beyond spike threshold (Supplemental Figure 1A). These data  
110 indicate that descending excitation can be quite potent, such that even brief and presumably sparse  
111 activity of auditory cortico-collicular neurons could in principle drive IC efferent signals  
112 independently of ascending inputs.

113

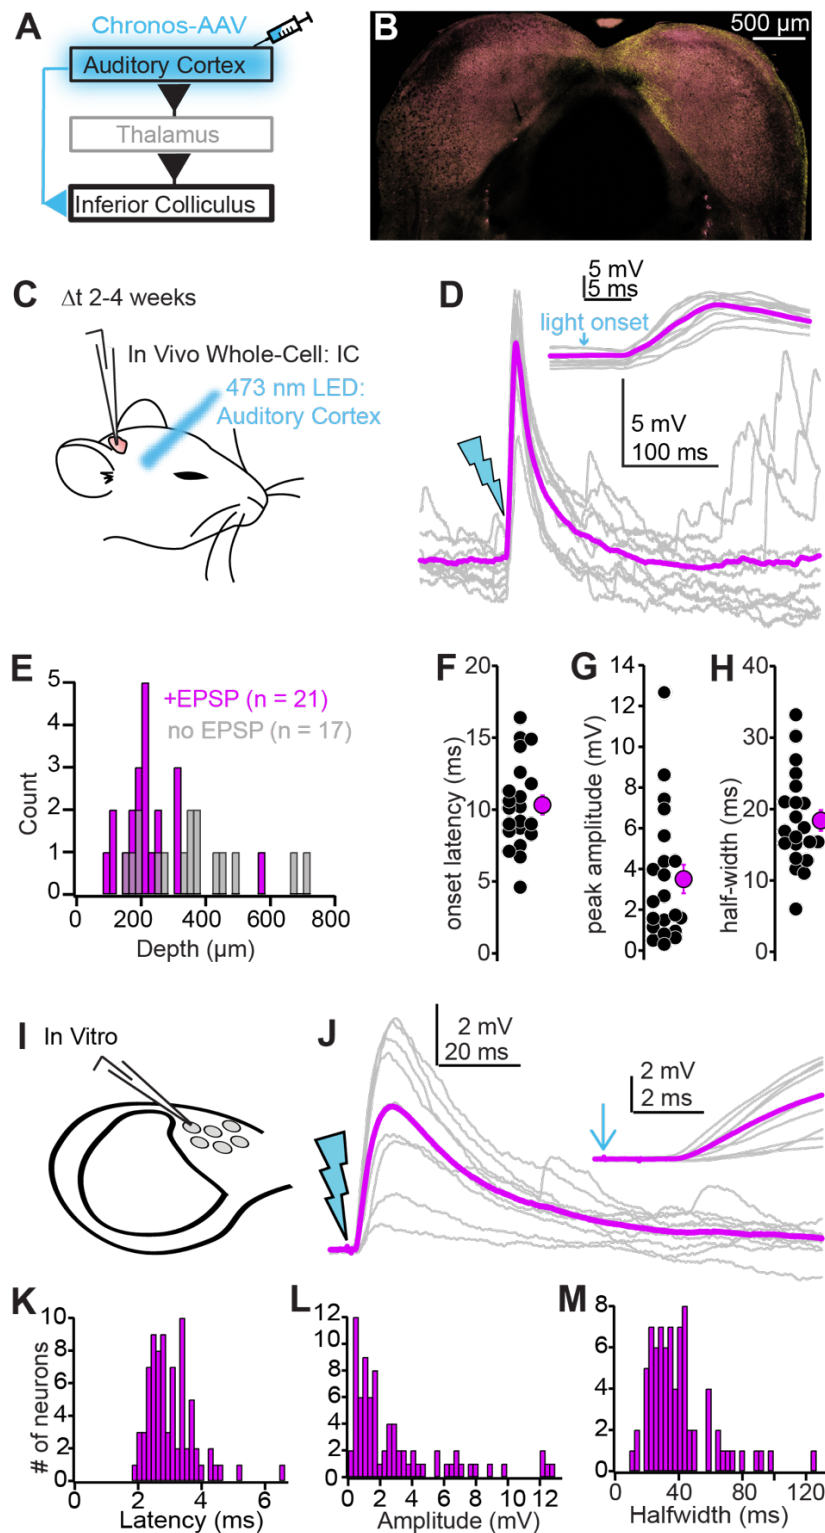

**Figure 1: Biophysical properties of auditory cortico-collicular synapses** **A)** Cartoon of experiment. **B)** Confocal stack of GFP-Chronos labeled axons mainly restricted to the shell IC. **C)** *In vivo* whole-cell recordings are obtained from IC neurons 2-4 weeks following Chronos injections; an optic fiber is positioned above the auditory cortex **D)** Example EPSPs following *in vivo* optogenetic stimulation. Gray traces are single trials; magenta is average. Inset is the EPSP rising phase at a faster timebase. **E)** Dorsal-ventral locations (relative to dura) for IC neurons where auditory cortical stimulation did (magenta) and did not (gray) evoke an EPSP. **F-H)** Summary of EPSP onset (F) amplitude (G), and half-width (H). **I)** whole-cell recordings obtained from dorso-medial shell IC neurons *in vitro*. **J)** EPSPs evoked by *in vitro* optogenetic stimulation (2 ms light flash). Inset: EPSP rising phase. **K-M)** Histograms of EPSP onset (K), amplitudes (L), and half-widths (M) *in vitro*.

114 Because the auditory cortex projects to many sub-cortical targets besides the IC, *in vivo* stimulation  
115 could drive polysynaptic excitation onto IC neurons that would complicate estimates of  
116 monosynaptic connectivity. We thus prepared acute IC brain slices from mice injected with Chronos  
117 in auditory cortex to quantify the functional properties of descending synapses in a more controlled  
118 setting. We targeted whole-cell current-clamp recordings specifically to neurons in the dorso-medial  
119 shell IC, as this region shows the highest density of corticofugal axons (Song et al., 2018; our  
120 Figure 1B). Stimulating auditory cortico-collicular axons via single blue light flashes delivered  
121 through the microscope objective (1-10 ms duration) drove EPSPs in  $n = 78$  neurons from  $N = 40$   
122 mice (Figure 1I,J). EPSPs had short-latency onsets following photo-stimulation (Figure 1K;  $3.0 \pm$   
123  $0.1$  ms), indicating a monosynaptic rather than polysynaptic origin. EPSPs *in vitro* had a similar  
124 range and mean peak amplitude as those recorded *in vivo* (Figure 1L;  $2.97 \pm 0.35$  mV,  $p=0.3$ ,  
125 Mann-Whitney test), and similarly could drive spikes in a subset of recordings (Supplemental Figure  
126 1B). Although the EPSP half-width was significantly slower *in vitro* compared to *in vivo* (Figure 1M;  
127  $39.6 \pm 2.3$  ms,  $p < 0.001$ , rank-sum test), this result is not surprising: The constant barrage of synaptic  
128 inputs *in vivo* is expected to generate a “high conductance state” that accelerates the membrane  
129 time constant (Destexhe et al., 2003).

130

131 In a separate set of experiments ( $n = 11$  neurons from  $N = 6$  mice), we quantified the kinetics of  
132 auditory cortical excitatory postsynaptic currents (EPSCs) as they appear at the soma using  
133 voltage-clamp recordings with a  $\text{Cs}^+$  based internal solution (Supplemental Figure 2. Peak  
134 amplitude =  $60.1 \pm 14.4$  pA; weighted decay time constant =  $4.5 \pm 0.5$  ms; 10-90% rise time of  $1.2 \pm$   
135  $0.2$  ms). Altogether, our results show that auditory cortico-collicular synapses substantially  
136 depolarize shell IC neurons independent of network-level, polysynaptic activity. In addition, EPSP  
137 kinetics are such that descending excitation will undergo significant temporal summation at firing  
138 rates observed during sound-evoked activity of auditory cortico-collicular neurons (20-50 Hz;  
139 Williamson and Polley, 2019).

140

141 *Synaptic strength reflects presynaptic convergence rather than unitary EPSP amplitudes*  
142 EPSP amplitudes spanned two orders of magnitude under our conditions (Figure 1G,L). Does this  
143 variability reflect a differential potency of individual synapses, or alternatively, differences in the  
144 number of presynaptic auditory cortical axons impinging onto individual shell IC neurons? We first  
145 estimated unitary EPSP amplitudes using a minimal stimulation paradigm designed to activate one  
146 (or very few) auditory cortico-collicular fibers. In these experiments, the LED intensity was titrated to  
147 the minimum power required for optogenetic responses to fluctuate between successful EPSPs and  
148 failures on a trial-by-trial basis (Figure 2A,B; mean failure rate across experiments:  $44 \pm 3\%$ ,  $n = 18$   
149 cells from  $N = 14$  mice). The mean amplitude of successful EPSPs was generally small ( $0.84 \pm 0.09$   
150 mV; Figure 2C) and similar to previous reports of unitary synapses between layer 5 pyramidal  
151 neurons in sensory cortex (Brown and Hestrin, 2009; Lefort et al., 2009). By contrast, progressively  
152 stronger LED flashes increased the amplitude of successful EPSPs compared to the minimal  
153 stimulation condition in many cells tested ( $n=15$  cells from  $N = 11$  mice; Figure 2D,E), indicating  
154 that multiple corticofugal axons can converge onto individual shell IC neurons. The ratio of  
155 maximum to minimum EPSP showing varied  $>10$ -fold across different experiments (median: 1.67,  
156 range: 0.91-24.04, Figure 2F), indicating that the EPSP amplitude variability across individual  
157 neurons likely reflects the number of presynaptic auditory cortical fibers recruited during stimulation

158 rather than differences in unitary strength. Importantly, the EPSP half-width was constant across  
 159 the range of stimulus intensities (Figure 2D, inset. EPSP halfwidth ratios at maximal and minimal  
 160 LED intensities:  $1.04 \pm 0.07$ ). This result indicates that increased LED intensities recruit more axons  
 161 rather than prolonging Chronos activation and temporally dispersing vesicle release from single  
 162 presynaptic boutons. We conclude that although the strength of individual auditory cortico-collicular  
 163 synapses is weak, the convergence of multiple presynaptic fibers ensures that descending signals  
 164 will substantially increase shell IC neuron excitability.

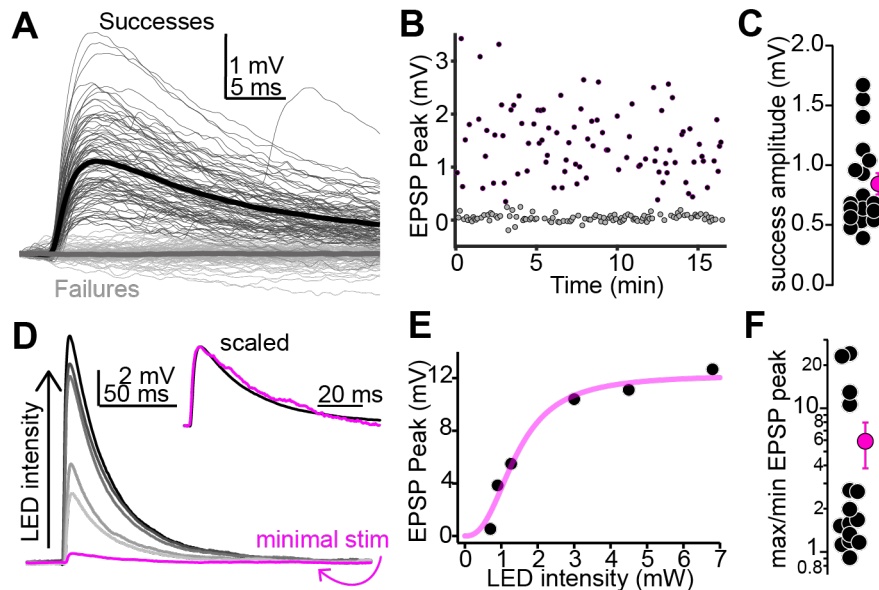

**Figure 2: Multiple auditory cortico-collicular fibers converge onto single shell IC neurons. A)** Example threshold optogenetic stimulation experiment. Thin black and gray traces are successes failures, respectively. Thick traces are averages. **B)** Diary plot from the experiment in panel A. black and gray symbols are successes and failures, respectively. **C)** Summary of putative unitary EPSP amplitudes **D)** Magenta: putative unitary EPSP (average of successes recorded at threshold stimulation). Black and Gray traces: averages of successes at increasing LED intensity. Data are from a different neuron as in A. Inset: Peak scaled and onset aligned EPSPs recorded at threshold and maximal intensity, revealing an identical time-course. **E)** EPSP peak amplitude is plotted as a function of LED intensity for the recording in (D). Magenta line is Hill fit. **F)** EPSP amplitude ratios at maximal and threshold LED intensities. Most values are  $>1$ , indicating convergence of at least 2 fibers. Of note, data are on a log scale.

165 *Auditory cortico-collicular synapses contact shell IC neurons with diverse biophysical properties*  
 166 IC neurons have a variety of firing patterns and membrane properties that potentially correspond to  
 167 distinct neuronal subtypes (Smith, 1992; Li et al., 1998; Peruzzi et al., 2000; Sivaramakrishnan and  
 168 Oliver, 2001; Ahuja and Wu, 2007; Sun and Wu, 2008; Moore and Trussell, 2017; Goyer et al.,  
 169 2019; Naumov et al., 2019; Silveira et al., 2020). However, whether auditory cortico-collicular  
 170 synapses contact biophysically homogenous or diverse neurons is unknown. We injected 300 ms  
 171 positive and negative current steps to quantify spiking patterns and passive membrane properties  
 172 in a subset of our *in vitro* experiments described above ( $n = 64$  cells). 62/64 cortico-recipient shell  
 173 IC neurons could be classified into one of four general categories. Over half of neurons (38/64) had  
 174 significant spike rate adaptation during positive current injections (Figure 3A,B) and qualitatively  
 175 similar firing patterns as the shell IC neurons recorded in rat slices by Smith (1992). However, 18 of  
 176 these “adapting” neurons responded to negative current with a sustained hyperpolarization (Figure  
 177 3A), whereas 20 displayed a prominent  $I_h$ -like “sag” likely mediated by HCN channels (Figure 3B,



187 *Temporal integration of auditory cortical inputs is moderately sub-linear*

188 Auditory cortico-collicular neurons in awake mice respond to acoustic stimuli with ~10-50 Hz spike  
189 trains (Williamson and Polley, 2019). Given the kinetics of auditory cortico-collicular EPSPs (Figure  
190 1), these spike rates are expected to result in significant temporal summation of descending  
191 signals. However, the use-dependent dynamics neurotransmitter release, as well as postsynaptic  
192 ion channels, can enforce sub- or supra-linear summation that effectively dictates the temporal  
193 integration of EPSPs (Markram et al., 1998; Pouille and Scanziani, 2004; Polsky et al., 2009). How  
194 do IC neurons integrate sustained cortical activity? We addressed this question by repetitively  
195 stimulating auditory cortico-collicular axons (10 light pulses at 20 or 50 Hz, 2 ms pulse width; Figure  
196 4A,B, black traces; n = 12 neurons from N = 7 mice). We quantified temporal integration by  
197 comparing the peak EPSP amplitudes observed after each light flash in the train to the amplitudes  
198 expected from the linear summation of a single auditory cortico-collicular EPSP recorded in the  
199 same neuron (Figure 4A,B; magenta traces). The observed peak amplitude of the 10th EPSP in the  
200 train reached  $92 \pm 13\%$  and  $77 \pm 16\%$  of that expected from linear summation at 20 and 50 Hz,  
201 respectively (Figure 4C,D). These results argue that at the population-level, auditory cortical firing  
202 rates are read out as moderately sub-linear shifts of the membrane potential towards threshold.

203  
204 Auditory cortico-collicular neurons display elevated firing rates at ~20 Hz for the entirety of long-  
205 duration, complex sounds (e.g., 4 s long dynamic chord stimuli; Williamson and Polley, 2019). We  
206 thus wondered if descending synapses maintain transmission during sustained acoustic  
207 processing, or if synaptic depression instead limits descending signals to sound onset. Stimulating  
208 auditory cortical axons with 4 s trains of light pulses at 20 Hz (Figure 4E) drove fast EPSPs riding  
209 atop a steady-state, tonic depolarization (Figure 4F; mean amplitude of DC component during the  
210 final 1 s of stimulation:  $1.18 \pm 0.01$  mV,  $p = 0.013$ , one-sample t-test compared to a hypothetical  
211 value of 0. n = 10 cells from n = 7 mice). Importantly, these effects were not an artifact of directly  
212 stimulating auditory cortico-collicular nerve terminals in brain slices: A similar tonic depolarization  
213 was observed in superficial IC neurons recorded *in vivo* using an optic fiber positioned over  
214 auditory cortex (Figure 4G,H; mean amplitude of DC component:  $1.5 \pm 0.7$  mV, n=19 cells from n =  
215 6 mice,  $p=0.53$  compared to *in vitro* data, rank-sum test).

216  
217 In addition, cessation of cortical stimulation *in vivo* also caused a long-lasting after-  
218 hyperpolarization (AHP) in 14/19 cells: The membrane potential rapidly fell below baseline after the  
219 last stimulus ( $\tau = 76.5 \pm 1.5$  ms) and recovered over several seconds ( $\tau = 2.6 \pm 0.6$  s; Supplemental  
220 Figure 3). Interestingly, this AHP was independent of postsynaptic spiking and thus may reflect  
221 buildup of feed-forward inhibition from local and long-range sources, or alternatively, a transient  
222 cessation of tonic descending excitation. Altogether, these experiments show that auditory cortico-  
223 collicular synapses can sustain transmission on seconds time scales via tonic and phasic  
224 excitation. In addition, the profound AHP following *in vivo* stimulation suggests that IC neuron  
225 excitability is bi-directionally yoked to auditory cortical firing patterns. Thus, increases as well as  
226 pauses in auditory cortico-collicular neuron activity may be of comparable significance to IC  
227 neurons.



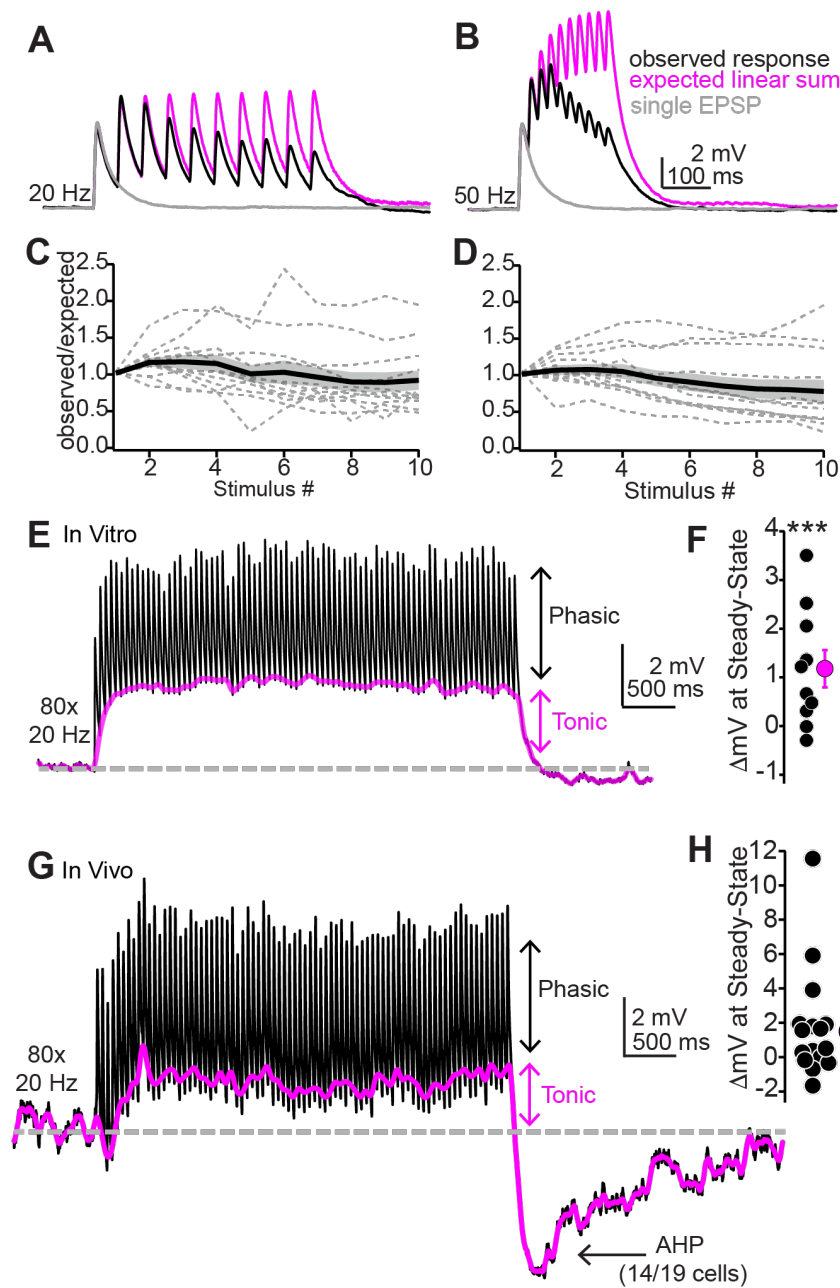

**Figure 4:** Repetitive synaptic activity tonically depolarizes shell IC neurons despite sub-linear temporal summation of EPSPs. **A,B)** Black traces: Average EPSPs evoked by 20 (A) or 50 Hz (B) trains of 10 light flashes. Gray: Average EPSPs evoked by a single 2 ms light flash recorded in the same neuron. Magenta: The expected response assuming linear summation of single EPSPs at each frequency. Of note is that the recorded EPSP amplitudes in the train are smaller than the expected linear sum. Data in A and B are from the same neuron. **C,D)** Summary of observed over expected amplitudes for EPSPs during 20 (C) or 50 Hz (D) trains. Gray dotted lines are individual neurons; black + shading are mean  $\pm$  SEM **E)** Sustained auditory cortical transmission generates phasic EPSPs (black) riding atop a tonic depolarization (magenta) *in vitro*. **F)** Group data quantifying membrane potential changes at steady-state (final 1 s of stimulation). **G,H)** Same as E and F but during *in vivo* recordings. Of note is the large AHP.

228 *NMDA receptors contribute to temporal integration of descending signals*

229 Central excitatory transmission is predominantly mediated by AMPA and NMDA type glutamate  
230 receptors, with NMDA receptors being particularly crucial for dendritic integration (Larkum et al.,  
231 2009; Branco et al., 2010), associative plasticity (Kerchner and Nicoll, 2008), and learning (Morris  
232 et al., 1986). The auditory cortico-collicular pathway is involved in perceptual learning following  
233 monaural hearing loss (Bajo et al., 2010), and NMDA receptors in the avian IC shell homologue  
234 preferentially contribute to receptive fields generated by experience-dependent plasticity (Feldman  
235 et al., 1996). We thus asked to what extent auditory cortico-collicular synapses activate NMDA  
236 receptors in shell IC neurons. Interestingly, bath application of the AMPA/kainate receptor  
237 antagonist NBQX (10  $\mu$ M) completely abolished EPSPs in all neurons tested (Figure 5A,B. Peak  
238 amplitude control:  $1.93 \pm 0.02$  mV; NBQX:  $0.09 \pm 0.03$  mV,  $p=0.004$ ,  $n=9$  cells from  $N = 7$  mice,  
239 Wilcoxon sign-rank test), indicating that AMPA receptors mediate the overwhelming majority of  
240 synaptic charge at descending synapses.

241  
242 By contrast, although the NMDA receptor antagonist R-CPP (5  $\mu$ M) had minimal effect on the peak  
243 amplitude of auditory cortico-collicular EPSPs evoked with single light flashes (Figure 5C,D;  $n = 9$   
244 cells from  $N = 6$  mice. Control:  $3.3 \pm 0.9$  mV, R-CPP:  $3.4 \pm 0.9$  mV,  $p = 0.67$ , paired t-test), R-CPP  
245 caused a modest but significant reduction in the EPSP half-width (Figure 5C,E; control:  $35.7 \pm 4.4$   
246 ms, R-CPP:  $30.4 \pm 4.7$  ms. 17.6% reduction,  $p=0.016$ , paired t-test). In addition, depolarizing  
247 neurons to +30 to +40 mV in voltage-clamp (using a  $\text{Cs}^+$ -rich internal solution) slowed the weighted  
248 decay time constant of optogenetically evoked EPSCs by 8.2 fold compared to negative holding  
249 potentials (Supplemental Figure 4; -60 to -70 mV:  $6.1 \pm 0.9$  ms, +30 to +40 mV:  $50.0 \pm 0.8$  ms,  $n = 5$   
250 cells from  $N = 3$  mice), consistent with the biophysical properties of NMDA receptors. We conclude  
251 that although AMPA receptors mediate the bulk of descending transmission at resting membrane  
252 potentials, glutamate released from descending synapses nevertheless reaches synaptic NMDA  
253 receptors to shape EPSP kinetics. Thus, although NMDA receptors contribute little to the peak  
254 amplitude of EPSPs during sparse stimulation, they may nevertheless control the integration of  
255 repetitive activity across time.

256  
257 Accordingly, R-CPP significantly reduced summation of auditory cortico-collicular EPSPs evoked by  
258 a train of 10 stimuli at 50 Hz (Figure 5F, G;  $n=10$  cells from  $N = 8$  mice. Main effect of drug  
259 condition in a two-way repeated measures ANOVA;  $F(1,9)=5.91$ ,  $p=0.038$ ), resulting in a 26%  
260 reduction in the cumulative integral of the synaptic depolarization (Figure 5F,H; control:  $1.42 \pm 0.35$   
261  $\text{mV} \cdot \text{s}$ , R-CPP:  $1.03 \pm 0.26$   $\text{mV} \cdot \text{s}$ ;  $p=0.012$ , paired t-test). These data show that NMDA receptors  
262 prolong the integration time window for descending signals, thereby boosting postsynaptic  
263 depolarizations during sustained cortical activity.

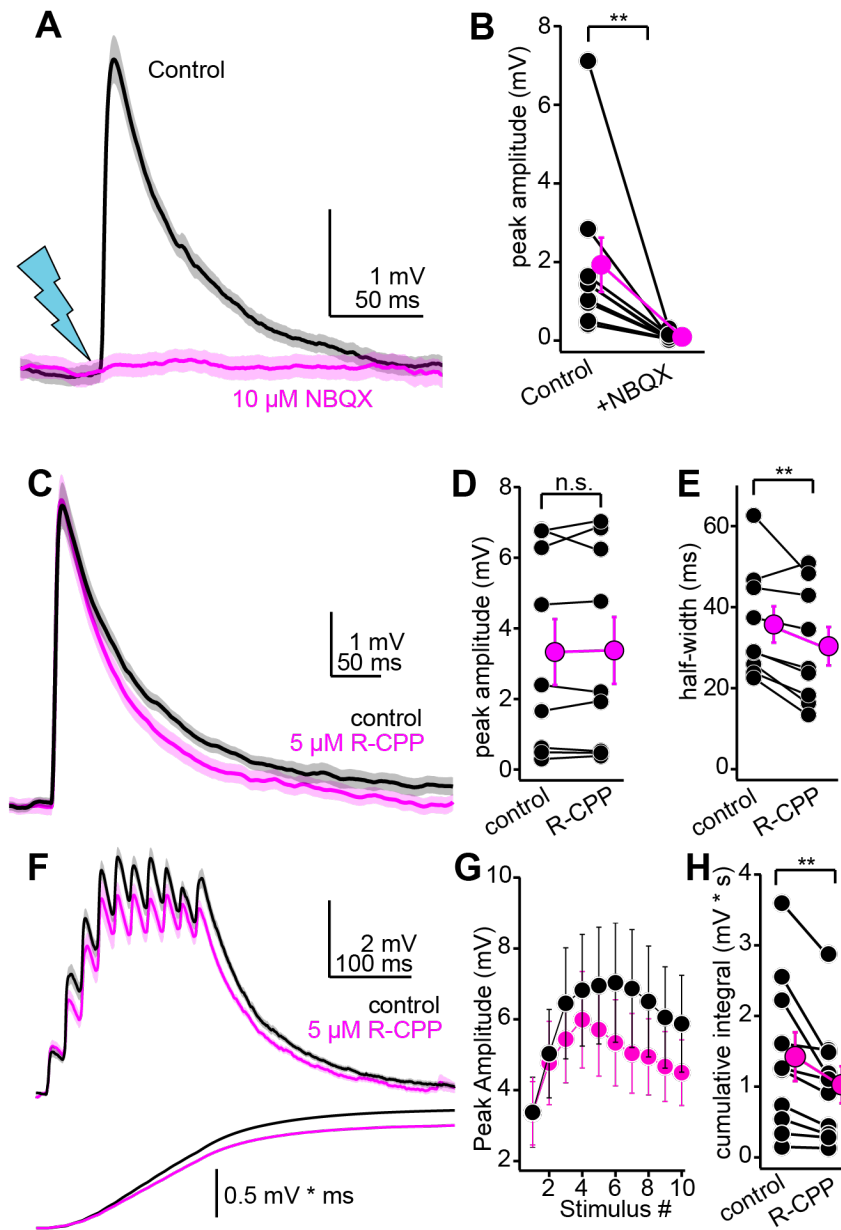

**Figure 5. Pharmacology of descending transmission.** **A**) EPSPs (mean  $\pm$  SEM) from a single neuron before (black) and after (magenta) bath application of NBQX (10  $\mu$ M). Of note is the absence of residual synaptic depolarization after NBQX. **B**) Summary data. For the effect of NBQX on descending EPSPs. **C**) EPSPs before and after R-CPP (black and magenta traces, respectively). **D, E**) Group data for the effect of R-CPP on EPSP peak amplitude (**D**) and half-width (**E**). Asterisks denote statistical significance. **F**) Upper panel: EPSPs (average  $\pm$  SEM) evoked by 10 light flashes at 50 Hz. Black and magenta are in control and R-CPP. Lower panel is the cumulative integral of the waveforms. **G**) Group data showing amplitude of each EPSP in the train (mean  $\pm$  SEM) before and after R-CPP (black and magenta, respectively). **H**) Group data for the effect of R-CPP on voltage integral as in **F**. Asterisks denote significance.

264 *Differential contribution of NMDA receptors at ascending and descending synapses*

265 The modest contribution of NMDA receptors at descending synapses is surprising, as previous  
266 studies suggest a rather prominent NMDA component at excitatory synapses in the IC (Smith,  
267 1992; Wu, 2004; Kitagawa and Sakaba, 2019). We thus wondered if our results reflected a relative  
268 paucity of NMDA receptors at all excitatory synapses onto shell IC neurons, or rather a unique  
269 feature of auditory cortico-collicular synapses. Shell IC neurons receive a prominent intra-collicular  
270 projection from the central IC which likely transmits a significant amount of ascending acoustic  
271 information (Saldaña and Merchán, 1992; Saldaña et al., 1996; Sun and Wu, 2009). We tested if  
272 the NMDA component differed between ascending and descending EPSPs in the same neuron  
273 using a dual pathway stimulation approach *in vitro*: A bipolar stimulating electrode was positioned in  
274 the central IC and Chronos was expressed in auditory cortex to activate ascending and descending  
275 synapses, respectively (Figure 6A). 2.5-5  $\mu\text{M}$  gabazine was present in all experiments to isolate  
276 excitatory transmission. Repetitive stimulation of either pathway (5x, 50 Hz) led to summing  
277 EPSPs which were differentially sensitive to NMDA receptor blockade (Figure 6B-C): 5  $\mu\text{M}$  R-CPP  
278 reduced the cumulative integral of central IC and auditory cortical EPSPs to  $44\pm 4\%$  and  $78\pm 4\%$  of  
279 baseline, respectively (Figure 6D,  $n=9$  cells from  $n = 8$  mice,  $p=0.0004$ , paired t-test), indicating that  
280 NMDA receptors contributed less at descending compared to ascending synapses. Thus, the  
281 extent of NMDA receptor contribution to descending transmission reflects a synapse-specific  
282 property of auditory cortico-collicular inputs rather than the global distribution of NMDARs in shell  
283 IC neurons.

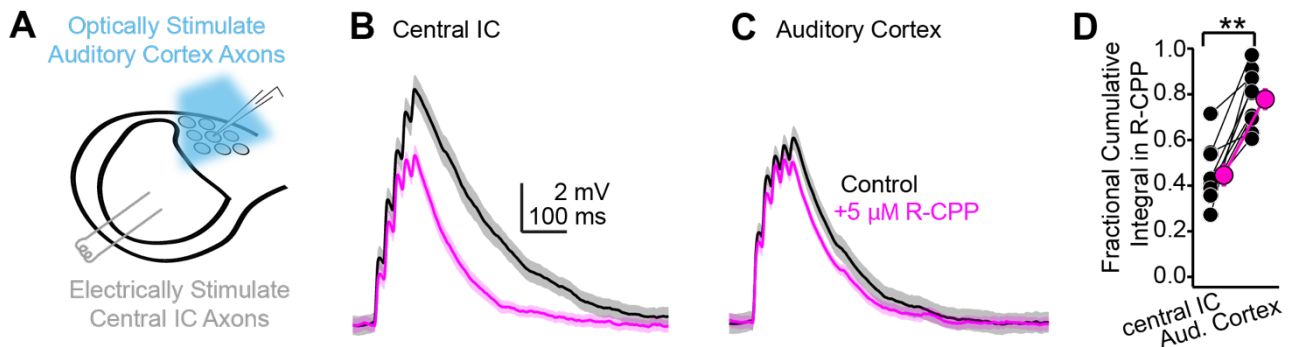

**Figure 6.** *Differential contribution of NMDA receptors at ascending and descending synapses.* **A)**

Cartoon of experiment: Blue light flashes delivered through the microscope objective activate descending auditory cortico-collicular axons; a bipolar electrode in the central IC stimulates ascending central  $\rightarrow$  shell IC axons. **B,C)** EPSPs evoked by 5x 50 Hz stimulation of central IC (B) or auditory cortex (C) axons, in absence or presence of R-CPP (black and magenta, respectively). Data in panels B and C are from the same neuron. **D)** Group data quantifying the fractional EPSP remaining in R-CPP (as measured by the cumulative integral of the EPSP waveform) for central IC and auditory cortico-collicular synapses.

284 *Auditory cortical inputs are predicted to arrive at the peak of EPSPs evoked by transient sounds*

285 Layer 5 auditory cortico-collicular neurons in awake mice respond to sound with a mean first-spike  
286 latency of  $\sim 21$  ms (Williamson and Polley, 2019). This value is surprisingly shorter than reported  
287 first spike latencies in shell IC neurons ( $\sim 35$  ms; Lumani and Zhang, 2010). Whether auditory  
288 cortical excitation arrives before, during, or after the onset of sound-evoked EPSPs in shell IC  
289 neurons effectively determines how ascending and descending signals integrate at the single cell

290 level, but the relative timing of distinct inputs onto IC neurons is unknown. We thus quantified the  
 291 relative timing of ascending sound-evoked and descending cortical EPSPs using *in vivo* whole-cell  
 292 recordings from superficial IC neurons of anesthetized mice. We first determined the onset latency  
 293 of descending EPSPs in IC neurons using electrical stimulation of the auditory cortex (Figure 7A).  
 294 We employed electrical, rather than optogenetic stimulation for these experiments because spike  
 295 onset following optogenetic stimulation is limited by the cell's membrane time constant and effective  
 296 spike threshold, whereas electrical stimulation bypasses somato-dendritic depolarization by directly  
 297 triggering axonal spikes. Single shocks delivered to the auditory cortex evoked EPSPs with an  
 298 onset latency of  $5.4 \pm 0.6$  ms ( $n = 7$  cells from  $n = 4$  mice; mean depth of recorded neurons  $188 \pm$   
 299  $14$   $\mu$ m, Figure 7B,C), indicating that descending information reaches IC neurons within a few ms of  
 300 AP initiation in auditory cortex. Since the mean first-spike latency of auditory cortico-collicular  
 301 neurons is  $\sim 21$  ms (Williamson & Polley, 2019) and the synaptic latency is 5-8 ms (Figure 7B,C),  
 302 these data collectively argue that that cortical feedback begins to excite IC neurons  $<30$  ms after  
 303 sound onset. Furthermore, assuming an axon path length of  $\sim 8$  mm from auditory cortex to shell IC  
 304 (Llano et al., 2014) and a synaptic release delay of  $\sim 2$  ms, the data suggest a minimum conduction  
 305 velocity of  $\sim 2.35$  m/s. These values are similar to conduction velocity estimates for the myelinated  
 306 axons of layer 5 pyramidal neurons in rodents (2.9 m/s; Kole et al., 2007), suggesting that layer 5,  
 307 and not unmyelinated layer 6 neurons, are the dominant source of descending signals to the IC.

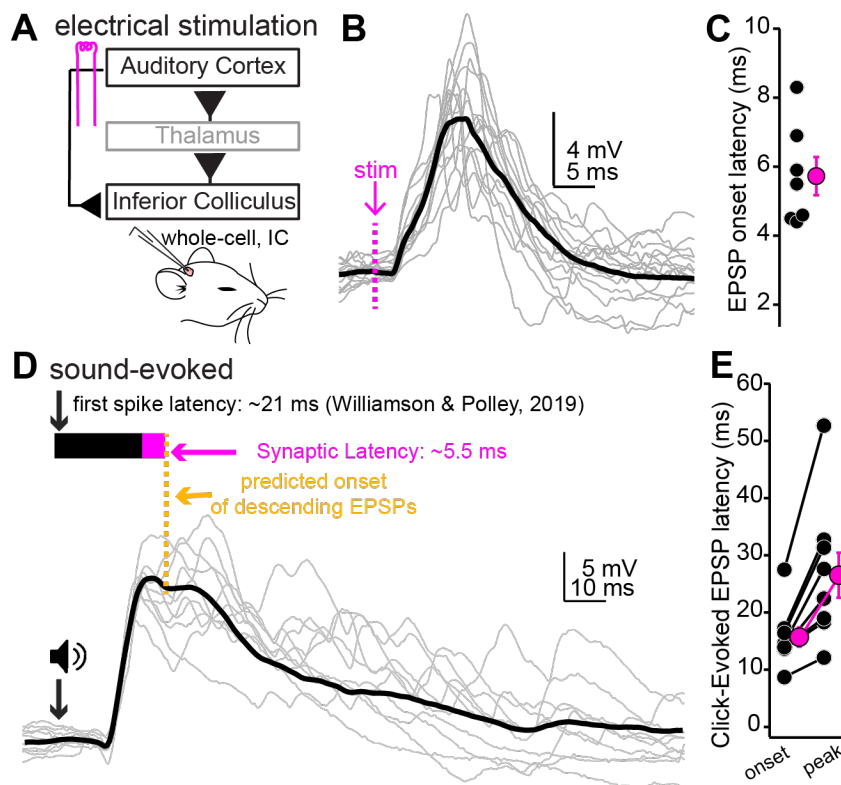

**Figure 7: Auditory Cortical feedback is predicted to collide with the peak of ascending excitation. A)** Cartoon of experiment. **B)** Example recording showing short latency EPSPs following a single shock to the auditory cortex. Dotted line is onset of stimulation. Gray traces are single trials; black is average. The stimulation artifact, as well as APs riding atop the cortical EPSP, were blanked for clarity. **C)** Group data for EPSP onset latency. **D)** EPSPs evoked by a 200  $\mu$ s click. Arrow and speaker show sound onset. Data are from a different neuron than in B. Black and magenta bars above the traces show the reported first spike latency of auditory cortico-collicular neurons from previous work and the synaptic latency calculated from panels B and C, respectively. **E)** Group data for onset and peak latency of click-evoked EPSPs.

308 We next calculated the timing of sound-evoked excitation onto superficial IC neurons using  
 309 broadband “click” transients (Figure 7D,  $n = 10$  cells from  $N = 7$  mice. Mean depth:  $204 \pm 23 \mu\text{m}$ ).  
 310 Although sound-evoked EPSPs were typically sub-threshold under our conditions, click stimuli  
 311 occasionally drove spikes in 5/10 experiments ( $33.8 \pm 16.6\%$  of trials), with mean first spike  
 312 latencies of  $29.4 \pm 7.6$  ms, similar to previous reports (Lumani and Zhang, 2010; Geis et al., 2011).  
 313 Sound evoked EPSPs had mean onset and peak latencies of  $15.7 \pm 1.7$  and  $26.5 \pm 3.9$  ms,  
 314 respectively (Figure 7E), indicating that cortical feedback lags the rising phase of sound-evoked  
 315 excitation by a mere 10-15 ms. Importantly, the data further suggest that cortical excitation will  
 316 arrive prior to, or in very close succession with, the peak of EPSPs evoked by transient sounds,  
 317 such that cortical feedback could in principle dictate the first spike latencies of shell IC neurons.  
 318

### *NMDA receptor dependent, supra-linear pathway integration in shell IC neurons*

319 Our latency measurements (Figure 7) suggest that ascending information is rapidly followed by  
 320 descending cortical excitation. This temporal overlap is intriguing because ascending and  
 321 descending synapses express NMDA receptors (Figure 6), which in other cell-types, enable  
 322 cooperative interactions between co-active pathways onto the same neuron (Takahashi and  
 323 Magee, 2009; Harnett et al., 2012). We thus hypothesized that appropriately timed cortical  
 324 feedback might integrate non-linearly with ascending inputs from the central IC, thereby generating  
 325 a synaptic depolarization larger than expected from the sum of either pathway active in isolation.  
 326 We tested this idea *in vitro* using our dual pathway stimulation approach (Figure 6) while recording  
 327 from shell IC neurons. We first recorded the synaptic depolarization following stimulation of  
 328 ascending and descending pathways in isolation (5 stimuli at 50 Hz; Figure 8A, upper traces).  
 329

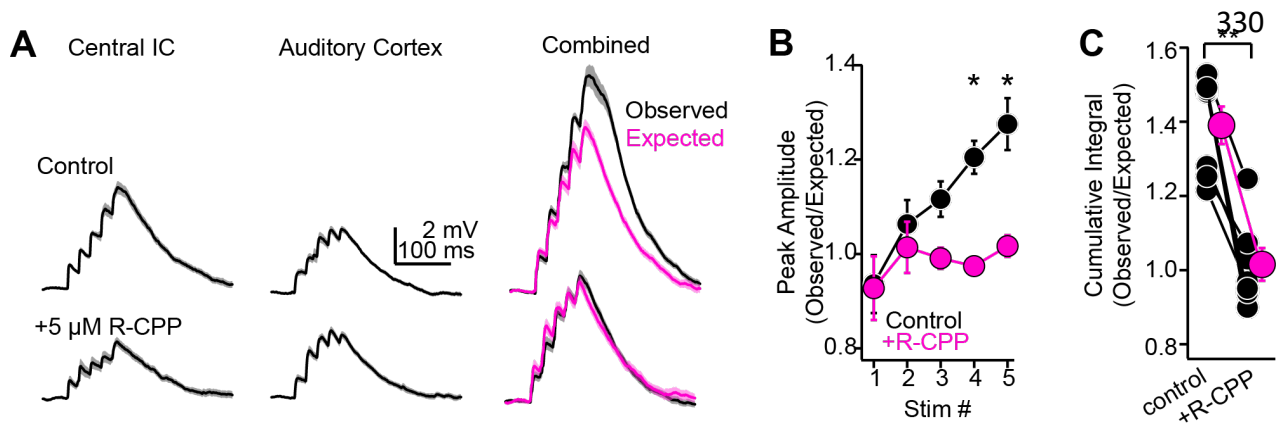

**Figure 8: NMDA-receptor dependent, supralinear pathway integration. A)** Upper and lower traces are during baseline conditions and after bath applying R-CPP. Left and middle panels: EPSPs during electrical or optogenetic stimulation of central IC or auditory cortical axons, respectively (5x, 50 Hz stimuli). Right panel (“Combined”): Black traces are the observed depolarization during simultaneous stimulation of both pathways. Magenta is the depolarization expected from the arithmetic sum of the waveforms following stimulation of either pathway alone (e.g., left and middle traces). Of note, the observed depolarization under control conditions is larger than expected from linear summation; blocking NMDA receptors linearizes pathway integration (compare black and magenta traces in R-CPP). **B)** Group data plotting the ratio of observed and expected peak amplitude for each of 5 EPSPs in a 50 Hz train during synchronous activation of central IC and auditory cortical synapses. Asterisks denote statistical significance of Bonferroni post-hoc test for the fourth and fifth stimuli following a main effect of drug condition ( $p=0.038$ ,  $F(1,9)$ , Two-way repeated measures ANOVA). **C)** Group data, observed over expected ratio of the cumulative integral during combined pathway activation in control conditions and in the presence of R-CPP. Asterisks denote statistical significance (sign-rank test).

331 We next simultaneously activated the two pathways such that the onset of cortical EPSPs collided  
332 with the peak of ascending EPSPs, as predicted from our *in vivo* latency measurements (Figure 7).  
333 The observed depolarization during synchronous pathway activation was on average significantly  
334 larger than expected from the arithmetic sum of each pathway stimulated alone (Figure 8A; n=12  
335 cells from N=9 mice. Cumulative integral observed:  $1.90 \pm 0.35$  mV\*ms, expected:  $1.45 \pm 0.22$   
336 mV\*ms,  $p=0.007$ , paired t-test), indicating that coincident activity of ascending and descending  
337 pathways summates supra-linearly. Importantly, R-CPP mostly abolished this supra-linear  
338 summation, such that the depolarization during coincident activation in R-CPP now equaled the  
339 expected sum of each pathway activated alone (Figure 8B,C, lower traces; n=7 cells from N = 7  
340 mice. Observed/Expected control:  $1.39 \pm 0.05$ ; in R-CPP:  $1.02 \pm 0.04$ ,  $p=0.0156$ , sign-rank test).  
341 Thus, synaptic NMDA receptors provide a supra-linear boost when descending excitation follows  
342 ascending activity, thereby promoting the non-linear mixing of distinct pathways in single IC  
343 neurons.

344  
345

## 346 Discussion

347

348 We have shown that the majority of neurons in the superficial (shell) IC layers receive reasonably  
349 strong excitation from auditory cortex that is predicted to arrive ~30 ms following sound onset.  
350 These synaptic properties could enable a context-dependent modulation of IC neurons across  
351 multiple timescales. Indeed, the rapid onset of descending EPSPs following cortical spikes (~5-8  
352 ms) is more than twice as fast as sensory-evoked cortical gamma rhythms (30-50 Hz). Thus,  
353 descending signals could effectively synchronize neural ensembles across the ascending auditory  
354 hierarchy either to the temporal envelope of sound (Weible et al., 2020) or to internally generated  
355 rhythms. Furthermore, descending synapses sustained transmission and drove tonic  
356 depolarizations even during seconds-long activity patterns, such that IC neurons may also integrate  
357 slower cortical state fluctuations. Intriguingly, auditory cortical neurons in behaving animals show  
358 enhanced firing rates during the delay period of auditory working memory tasks (Gottlieb et al.,  
359 1989) which apparently, precedes similar activity patterns in prefrontal cortex (Huang et al., 2016).  
360 If these working memory related neuronal ensembles include auditory cortico-collicular neurons,  
361 sustained transmission from descending synapses could cause seconds-long increases in IC  
362 neuron excitability based on working memory content. Accordingly, persistent delay period activity  
363 is observed in ~10% of IC neurons when rats engaged in an auditory working memory task  
364 (Sakurai, 1990), although future studies are necessary to determine the extent to which this activity  
365 is inherited from descending auditory cortical pathways.

366

367 Finally, although our data suggest that shell IC neurons are the major target of descending fibers,  
368 the non-uniform thickness of the IC shell across medial-lateral axis (Barnstedt et al., 2015)  
369 indicates we cannot rule out that some of our *in vivo* data are from neurons in the most dorsal  
370 region of the central IC. Indeed, *in vivo* intracellular recordings from neurons in the deep IC layers  
371 report EPSPs following auditory cortex stimulation (Mitani et al., 1983; Qi et al., 2020), implying that  
372 some functional cortical synapses may in fact target central IC neurons. However, *in vitro* circuit  
373 mapping experiments imply that monosynaptic connections between auditory cortex and central IC

374 are likely very rare (Xiong et al., 2015; Song et al., 2018), such that shell IC neurons likely process  
375 the bulk of descending signals.

376

### 377 *Synapse-specific contribution of NMDA receptors in shell IC neurons*

378 The minor contribution of NMDA receptors to auditory cortico-collicular transmission is somewhat  
379 surprising, as synaptic NMDA receptors are activated even at hyperpolarized membrane potentials  
380 in central IC neurons (Ma et al., 2002; Wu, 2004; Goyer et al., 2019; Kitagawa and Sakaba, 2019).  
381 However, our results do not simply reflect a global paucity of NMDA receptors at excitatory  
382 synapses onto dorso-medial shell IC neurons, but rather can be explained by a pathway specific  
383 contribution of specific glutamate receptor sub-types to the synaptic depolarization: NMDA receptor  
384 blockade reduced EPSPs to a greater extent at central IC -> shell IC compared to auditory cortico-  
385 collicular synapses. Although a simple explanation is that the total number of synaptic NMDA  
386 receptors in shell IC neurons differs in a pathway specific manner, we cannot exclude differences in  
387 NMDA receptor subunit composition (Schwartz et al., 2012), glutamate diffusion (Arnth-Jensen et  
388 al., 2002), and synapse location (Branco et al., 2010; Song et al., 2018) as contributing factors.

389

### 390 *Non-linear integration of ascending and descending signals*

391 Intra-collicular synapses originating from the central IC likely provide a significant amount of  
392 ascending acoustic input to shell IC neurons. Indeed, reported first spikes latencies of central IC  
393 neurons typically lead the onset of sound evoked EPSPs in shell IC neurons (Syka et al., 2000;  
394 Hurley and Pollak, 2005), and central IC neurons send tonotopically organized axonal projections to  
395 the IC shell that conspicuously mirror the tonotopic distribution of best frequencies in the shell IC  
396 (Saldaña and Merchán, 1992; Wong and Borst, 2019). By contrast, the onset of sound-evoked  
397 EPSPs in shell IC neurons typically begin prior to the reported first spikes of auditory cortico-  
398 collicular neurons, thereby ruling out the possibility that acoustic responses are solely inherited  
399 from auditory cortex. Instead, axonal conduction velocities along ascending and descending  
400 pathways impose an obligatory delay such that cortical feedback excitation arrives ~25-30 ms  
401 following the onset of sound-evoked EPSPs. Notably, while glutamate released from ascending  
402 terminals will have unbound and diffused away from low-affinity synaptic AMPA receptors prior to  
403 the onset of cortical feedback excitation (Clements et al., 1992), high-affinity NMDA receptors are  
404 expected to remain bound with glutamate during this time (Lester and Jahr, 1992). Extracellular  
405  $Mg^{2+}$  imparts a voltage-dependence to the NMDA receptor channel; the additional depolarization  
406 provided by cortical feedback would thus be expected to cooperatively enhance current flowing  
407 through NMDA receptors at ascending synapses active immediately prior to the onset of cortical  
408 feedback. This prediction is supported by our data showing a NMDA receptor-dependent, supra-  
409 linear summation of ascending and descending inputs that are activated similar to their expected  
410 timing *in vivo*. These single-cell, biophysical operations can potentially explain the non-linear  
411 changes in IC neuron receptive fields during cortical inactivation (Yan and Suga, 1999; Nakamoto  
412 et al., 2008, 2010).

413

414 NMDA receptor dependent non-linearities are typically thought of as unique features of cortical  
415 pyramidal neurons that support to the computational power of these high-level microcircuits.  
416 Nevertheless, multiplicative integration of sound localization cues has been observed in single  
417 neurons of barn owl IC (Peña and Konishi, 2001; 2002), and the NMDA receptor dependent non-



418 linearity we observe is comparable in magnitude to that reported during clustered activation of  
419 neighboring synapses in CA1 neurons (Harnett et al., 2012). Together, these data suggest that  
420 cooperative interactions between temporally correlated inputs may be a common neuronal  
421 operation throughout the central nervous system. An important distinction however is that most, if  
422 not all excitatory synapses in pyramidal neurons reside on dendritic spines; this  
423 compartmentalization greatly limits any cooperative interactions to neighboring synaptic inputs on  
424 the same branch (Gasparini and Magee, 2006; Losonczy and Magee, 2006). By contrast, auditory  
425 cortico-collicular axons often form large ( $\sim 5 \mu\text{m}^3$ ) synapses on the soma of dorsal IC neurons  
426 (Song et al., 2018). Depending on the impedance mismatch between the somatic and dendritic  
427 compartments, synaptic depolarizations at the soma could propagate passively throughout the  
428 neuron's multiple dendrites, thereby enabling cortical signals to non-linearly control ascending  
429 information irrespective of the spatial relationship of co-active inputs. However, further studies are  
430 necessary to identify the precise anatomical relationship between ascending and descending  
431 synapses in single IC neurons.

432

### 433 *Implications for experience-dependent plasticity and perceptual learning*

434 Several studies now show that layer 5 corticofugal pyramidal neurons are necessary for perceptual  
435 learning in multiple different sensory tasks. Optogenetic inhibition of layer 5 pyramidal neurons in  
436 somatosensory cortex prevents behavioral adaptation following cue-related changes in a tactile  
437 detection task, although the same manipulation had no effect on touch perception (Ranganathan et  
438 al., 2018). Similarly, lesioning visual corticostriatal neurons prevents acquisition, but not  
439 performance of a visual detection task (Ruediger and Scanziani, 2020). In the auditory system,  
440 chemical lesions of auditory cortico-collicular neurons prevent the experience-dependent recovery  
441 of sound localization following monaural hearing loss (Bajo et al., 2010), although auditory cortex  
442 becomes dispensable for sound-localization once animals have learned to localize sounds using  
443 monaural cues (Bajo et al., 2019). Thus, although necessary for perceptual learning, corticofugal  
444 synapses may not be the primary locus of experience-dependent plasticity. Indeed, classic studies  
445 in barn owls suggest that ascending central IC  $\rightarrow$  external (shell) IC synapses are the first site of  
446 experience-dependent, spatial map plasticity in the auditory system (Brainard and Knudsen, 1993).  
447 In tandem with our current study, these results suggest that auditory cortico-collicular synapses'  
448 contributions to perceptual learning may not lie in their explicit ability to undergo classical Hebbian  
449 associative plasticity, but rather as permissive forces of heterosynaptic plasticity at ascending  
450 synapses.

451

452

## 453 **Methods**

454

455 *Surgery for viral injections:* All experiments were approved by the University of Michigan's IACUC  
456 and performed in accordance with NIH's Guide for the care and use of laboratory animals. All  
457 surgical procedures were performed under aseptic conditions. Surgeries were performed on 4-7  
458 week old male or female C57BL6/J mice purchased from Jackson Labs or offspring of CBA x  
459 C57BL6/J matings bred in house. Mice were deeply anesthetized with 4-5% isoflurane vaporized in  
460 O<sub>2</sub> and mounted in a rotating stereotaxic frame (model 1430, David Kopf Instruments). Isoflurane  
461 was subsequently lowered to 1-2% to maintain a deep anesthetic plane, as assessed by the

462 absence of paw withdrawal reflex and stable respiration (1-1.5 breaths/s). Body temperature was  
463 maintained near 37-38° C using a feedback controlled, homeothermic heating blanket (Harvard  
464 Apparatus). Mice were administered 5 mg/kg carprofen after induction as a pre-surgical analgesic.  
465 The scalp was clear of hair, swabbed with betadine, and a small incision was made in the skin  
466 overlying the left hemisphere. Topical 2% lidocaine was then applied to the wound margins. The  
467 stereotaxic frame was rotated ~50 degrees, allowing a vertical approach perpendicular to the layers  
468 of auditory cortex. A 200-400 µm craniotomy was carefully opened over the left auditory cortex (-  
469 2.75 mm from Bregma, centered on the lateral ridge) using a 0.5 mm diameter dental burr (19007-  
470 05, Fine Science Tools) and Foredom microdrill. The skull was frequently irrigated with chilled  
471 phosphate buffered saline (PBS) to prevent overheating during drilling. Following the craniotomy, a  
472 glass pipette (0.1-0.2 mm diameter at the tip) containing the pAAV-Syn-Chronos-GFP virus  
473 (Addgene #59170-AAV1) penetrated the auditory cortex at a rate of <10 µm/s using a motorized  
474 micromanipulator. A total of 100-200 nL virus was injected at 2-4 sites 810 and 710 µm below the  
475 pial surface (25-50 nL per site). Following injections, the pipette was maintained in place for an  
476 additional 5 min before slowly retracting at a rate of <10 µm/s. At the end of the surgery, the  
477 craniotomy was filled with bone wax, the skin was sutured, and the mouse was removed from the  
478 stereotax. Immediately following surgery, mice were given an analgesic injection of buprenorphine  
479 (0.03 mg/kg, s.c.) and allowed to recover on a heating pad before returning to their home cage. An  
480 additional post-operative dose of carprofen was administered 24 hours following surgery.

481  
482 *In vivo electrophysiology:* 2-4 weeks following viral injections, mice were deeply anesthetized with  
483 isoflurane and mounted in a stereotax as described above. The skin overlying the skull was  
484 removed, the left temporal muscle was retracted, the stereotax was rotated ~50 degrees, and a 2-  
485 2.5 mm craniotomy was carefully opened over the left auditory cortex. For optogenetic stimulation  
486 in Figure 1, the dura overlying the auditory cortex was left intact and a cranial window was  
487 implanted over the exposed brain with cyanoacrylate glue and dental cement. For the electrical  
488 stimulation experiments in Figure 7, a small slit was carefully made in the dura and the craniotomy  
489 was subsequently sealed with silicone elastomer. The stereotaxic frame was returned to the  
490 horizontal position and a custom titanium headbar was affixed to the skull with dental cement. A  
491 300-500 µm craniotomy was opened over the left IC and filled with a silicone elastomer plug. The  
492 mouse was then removed from the stereotax, anesthetized with urethane (1.5 g/kg, i.p.), and head-  
493 fixed in a custom-made sound attenuation chamber. Body temperature during the experiment was  
494 maintained at 37-38° C with a custom designed, feedback-controlled heating blanket. For  
495 optogenetic stimulation, a 0.5 NA, 400 µm core optic fiber (Thorlabs M45L02) coupled to a 470 nm  
496 LED (Thorlabs M470F3) was mounted on a micromanipulator and positioned <1 mm away from the  
497 auditory cortex cranial window. For electrical stimulation experiments, the silicone plug over  
498 auditory cortex was removed and a bipolar platinum-iridium electrode (FHC 30210) was carefully  
499 inserted ~800 µm into auditory cortex at an angle roughly perpendicular to the cortical layers.  
500 Electrical stimuli were delivered via a custom stimulus isolator designed in house. Sound clicks (0.2  
501 ms duration) were presented at ~91 dB peak equivalent SPL via a free-field speaker (Peerless  
502 XT25SC90-04) positioned ~10 cm from the mouse's right ear. For whole-cell recordings, the  
503 silicone plug over the IC was removed and patch-clamp recordings were obtained from IC neurons  
504 via the "blind patch" approach using pipettes filled with K<sup>+</sup>-rich internal solution containing (in mM):  
505 115 K-Gluconate, 4 KCl, 0.1 EGTA, 10 HEPES, 14 Tris-Phosphocreatine, 4 Mg-ATP, 0.5 Tris-GTP,

506 4 NaCl, pH 7.2-7.3, 290 mOsm (open tip resistance: 5-10 M $\Omega$ ). Data were acquired using an AM  
507 Systems model 2400 patch-clamp amplifier, online filtered at 2-10 kHz, and digitized at 50 kHz with  
508 a National Instruments PCI-6343 card + BNC2090A interface controlled by Matlab based  
509 acquisition software (Wavesurfer). Data were recorded with the amplifier's pipette capacitance  
510 neutralization circuitry activated. Series resistance was typically between 20-60 M $\Omega$ .

511

512 *In vitro electrophysiology:* 2-4 weeks following viral injections, mice were deeply anesthetized with  
513 isoflurane, swiftly decapitated, and the brains carefully removed in warm (~34° C), oxygenated  
514 ACSF containing (in mM): 119 NaCl, 25 NaHCO<sub>3</sub>, 3 KCl, 1.25 NaH<sub>2</sub>PO<sub>4</sub>, 15 glucose, 1 MgCl<sub>2</sub>, 1.3  
515 CaCl<sub>2</sub>, 1 ascorbate, 3 pyruvate. 200-300  $\mu$ m thick coronal slices of the IC were prepared with a  
516 vibratome (Campden Instruments). On each slice, a small cut was made in the lateral portion of the  
517 right cerebellum or right IC to aid with visual identification of the un-injected hemisphere. Slices  
518 were then incubated at 34° C in a holding chamber filled ACSF for 25-30 min and subsequently  
519 stored at room temperature. Experiments were generally performed within 3-4 hours following slice  
520 preparation. Following incubation, a slice was transferred to a recording chamber and held in place  
521 with single strands of unwaxed dental floss tightly strung around a platinum "harp". The slice was  
522 continuously perfused with oxygenated ACSF heated to 32-34° C (2-4 mL/min; chamber volume: ~  
523 1 mL). 2-5  $\mu$ M SR95531 was added to the ACSF to block GABA<sub>A</sub> receptors in experiments of  
524 Figure 5C-H, Figure 6, Figure 8, Supplemental Figures 2 and 4, and some experiments of Figure 1.  
525 Neurons in the dorso-medial shell IC were visualized via DIC or Dodt contrast optics using a 40x or  
526 63x objective (Zeiss Axioskop 2 FS Plus or Olympus BXW51 microscope). Neurons were targeted  
527 for whole-cell current-clamp recordings with pipettes filled with the same K<sup>+</sup>-rich internal solution  
528 used for *in vivo* recordings (open tip resistance: 3-6 M $\Omega$ ). For whole-cell voltage clamp  
529 experiments, the internal solution contained (in mM): 110 Cesium Methanesulfonate, 10 QX-314-  
530 Bromide, 0.1 EGTA, 10 HEPES, 0.5 Tris-GTP, 4.5 MgATP, 5 TEA-Cl, 10 Tris-phosphocreatine. In  
531 some experiments, 30  $\mu$ M Alexa 594 or 0.1% biocytin were added to the internal solution to  
532 visualize neuronal morphology via online fluorescence or post-hoc histological reconstruction.

533

534 Data were acquired with a Multiclamp 700B or AM System model 2400 amplifier, online filtered at  
535 2-10 kHz, and digitized at 50 kHz with a National Instruments PCI-6343 card + BNC2090A interface  
536 controlled by Wavesurfer. In current clamp, pipette capacitance neutralization was employed and  
537 bridge balance was maintained (series resistance typically 10-30 M $\Omega$ ). In a few instances, a small  
538 amount of negative bias current (-5 to -50 pA) was injected to hyperpolarize neurons and prevent  
539 spike initiation during optogenetic activation of cortico-collicular synapses. Series resistance  
540 compensation was employed in voltage clamp experiments (60-80%, bandwidth: 3 kHz). For dual  
541 pathway experiments, the central IC was electrically stimulated using an AM systems model 2100  
542 stimulus isolator delivering biphasic shocks to a theta glass bipolar electrode placed ~500  $\mu$ m from  
543 the recorded neuron. Drugs were obtained from Tocris or HelloBio, aliquoted as stock solutions in  
544 distilled water, and stored at -20 C until the day of the experiment.

545

546 *Data analysis:* Electrophysiology data were analyzed using custom Matlab scripts. EPSP analyses  
547 were performed on averages of multiple trials (typically >10 trials per condition) after baseline  
548 membrane potential subtraction and lowpass filtering at 1 kHz unless explicitly noted in the text.  
549 Peak amplitudes of single EPSPs were calculated by averaging data points  $\pm$ 0.1 ms around the

550 local maximum following optogenetic stimulation Halfwidths are calculated as the full width at half-  
551 maximum of the peak. EPSP onset latency was defined as the time following optogenetic stimulus  
552 onset when the membrane potential reaches 20% of peak. The tonic EPSP amplitude during 20 Hz  
553 trains was calculated as follows: We first linearly interpolated the membrane potential data between  
554 each light flash to remove the phasic EPSP component. The trace was then smoothed using a 50  
555 ms sliding window. Datapoints during the final 1s period of the stimulus train were then averaged to  
556 estimate the amplitude of tonic membrane potential change. In certain experiments of Figures 4, 7,  
557 and 8, train stimuli and click sounds occasionally triggered APs in IC neurons both *in vivo* and *in*  
558 *vitro*. In these cases, APs were digitally removed prior to averaging the traces by linearly  
559 interpolating 0.1-0.2 ms of datapoints after the membrane potential crossed spike threshold (~20  
560 mV/ms). Shock artifacts during electrical stimulation experiments were similarly removed via linear  
561 interpolation. In summary plots, black symbols are individual cells, magenta is mean  $\pm$  SEM, and  
562 lines connect data from the same recording unless otherwise stated.

563  
564 The expected linear waveforms for temporal summation experiments were calculated as follows.  
565 The average waveform of a single optogenetically evoked EPSP was peak normalized to the first  
566 EPSP in the recorded 20 or 50 Hz train from the same cell. We subsequently convolved the single  
567 EPSP waveform with a 20 or 50 Hz binary pulse train using the Matlab function `convr()`. We then  
568 calculated the peak amplitude ratios for each EPSP in observed and expected trains.

569  
570 For the free-field sound presentation experiments of Figure 7D-E, we limited our analyses to  
571 superficial IC neurons that showed onset EPSPs in response to clicks. Other IC neurons  
572 encountered during these experiments showed either sound-evoked IPSPs (n=7 cells from N=5  
573 mice) or IPSPs followed by rebound depolarizations (n=6 cells from N=5 mice); analyses of these  
574 data will be presented in a separate report.

575  
576 In dual pathway experiments of Figure 8, the onset latency of ascending and descending EPSPs  
577 varied across cells. Thus, the relative timing of electrical and optogenetic stimulation during  
578 combined pathway activation was calculated online and on a cell-by-cell basis, such that the onset  
579 of descending auditory cortical EPSPs collided with the peak of ascending EPSPs from central IC  
580 as predicted from our *in vivo* latency measurements (Figure 7; range of  $\Delta t$  between stimulation of  
581 descending and ascending synapses: -1.3 to 16.4 ms). These stimulation parameters were held  
582 constant across control and R-CPP conditions for each cell. The expected linear summation was  
583 calculated by digitally summing the average synaptic waveforms following stimulation of either  
584 pathway alone, accounting for the temporal offset employed during synchronous pathway  
585 activation.

586  
587 Histology and Confocal Imaging: Mice were deeply anesthetized in a glass induction chamber  
588 circulated with 4.2 mL isoflurane and transcardially perfused with ~80-100 mL of PBS followed by  
589 ~80-100 mL of 10% buffered formalin (Fisher Scientific catalog # 23-245684). Brains were carefully  
590 removed, stored in 10% formalin and protected from light for 24 hours. Subsequently, brains were  
591 stored in PBS for up to 72 hours and 100  $\mu$ m thick coronal slices were cut using a ceramic blade  
592 (Cadence Endurium) and a Leica VT1000s vibratome, mounted onto slides and coverslipped using  
593 Fluoromount, then protected from light and allowed to dry at room temperature for ~12-24 hours.

594 Slides were then stored at 4 C until ready for use. Images were collected using a Leica TCS SP8  
595 laser scanning confocal microscope equipped with a 10x objective.

596

597 **Statistics:** Although not explicitly pre-determined prior to data collection, sample sizes reflect  
598 commonly accepted standards in the field. Data were tested for normality using a Lilliefors test prior  
599 to statistical comparisons. Parametric, two-tailed t-tests are employed for normally distributed data.  
600 Non-parametric rank-sum or sign-rank tests are used when one or more of the distributions deviate  
601 from normal. Alpha is corrected for multiple comparisons in post-hoc significance tests following  
602 ANOVA. Statistics were run in Matlab or Graphpad Prism 9.

603

604 **Author Contributions:** HMO conducted and analyzed most electrophysiology experiments in Figure  
605 7, with contributions from PFA. HMO, AF, and JC performed viral injections. AF performed  
606 histology and confocal microscopy experiments in Figure 1. PFA conducted and analyzed most  
607 electrophysiology experiments in Figures 1-6 and Figure 8, with contributions from HMO. PFA  
608 designed the experiments, interpreted the results, and wrote the paper.

609

610 **Acknowledgments:** Funding was generously provided by the Whitehall Foundation, Hearing Health  
611 Foundation, and NIH/NIDCD R01DC019090 to PFA, as well as T32 DC005356 and T32 DC000011  
612 pre-doctoral awards to HMO. We thank Mr. Deepak Dileepkumar for outstanding technical support,  
613 Drs. Michael Roberts, Marina Silveira, Gunnar Quass and Meike Rogalla for critical comments on  
614 the manuscript.

615

## 616 **References**

617

618 Abbott LF, Varela JA, Sen K, Nelson SB (1997) Synaptic depression and cortical gain control. *Science* 275:220–224.

619 Ahuja TK, Wu SH (2007) Intrinsic membrane properties and synaptic response characteristics of neurons in the rat's  
620 external cortex of the inferior colliculus. *Neuroscience* 145:851–865.

621 Anderson LA, Malmierca MS (2013) The effect of auditory cortex deactivation on stimulus-specific adaptation in the  
622 inferior colliculus of the rat. *Eur J Neurosci* 37:52–62.

623 Arnth-Jensen N, Jabaudon D, Scanziani M (2002) Cooperation between independent hippocampal synapses is  
624 controlled by glutamate uptake. *Nat Neurosci* 5:325–331.

625 Ayala YA, Udeh A, Dutta K, Bishop D, Malmierca MS, Oliver DL (2015) Differences in the strength of cortical and  
626 brainstem inputs to SSA and non-SSA neurons in the inferior colliculus. *Sci Rep* 5:10383.

627 Bajo VM, Nodal FR, Korn C, Constantinescu AO, Mann EO, Boyden ES, King AJ (2019) Silencing cortical activity  
628 during sound-localization training impairs auditory perceptual learning. *Nat Commun* 10:3075.

629 Bajo VM, Nodal FR, Moore DR, King AJ (2010) The descending corticocollicular pathway mediates learning-induced  
630 auditory plasticity. *Nat Neurosci* 13:253–260.

631 Barnstedt O, Keating P, Weissenberger Y, King AJ, Dahmen JC (2015) Functional Microarchitecture of the Mouse  
632 Dorsal Inferior Colliculus Revealed through In Vivo Two-Photon Calcium Imaging. *J Neurosci* 35:10927–10939.

633 Blackwell JM, Lesicko AM, Rao W, De Biasi M, Geffen MN (2020) Auditory cortex shapes sound responses in the  
634 inferior colliculus. *eLife* 9:e51890.

- 635 Bordi F, LeDoux JE (1994) Response properties of single units in areas of rat auditory thalamus that project to the  
636 amygdala: II. Cells receiving convergent auditory and somatosensory inputs and cells antidromically activated  
637 by amygdala stimulation. *Exp Brain Res* 98:275–286.
- 638 Brainard MS, Knudsen EI (1993) Experience-dependent plasticity in the inferior colliculus: a site for visual calibration of  
639 the neural representation of auditory space in the barn owl. *J Neurosci Off J Soc Neurosci* 13:4589–4608.
- 640 Branco T, Clark BA, Häusser M (2010) Dendritic discrimination of temporal input sequences in cortical neurons.  
641 *Science* 329:1671–1675.
- 642 Brown SP, Hestrin S (2009) Intracortical circuits of pyramidal neurons reflect their long-range axonal targets. *Nature*  
643 457:1133–1136.
- 644 Cai D, Yue Y, Su X, Liu M, Wang Y, You L, Xie F, Deng F, Chen F, Luo M, Yuan K (2019) Distinct Anatomical  
645 Connectivity Patterns Differentiate Subdivisions of the Nonlemniscal Auditory Thalamus in Mice. *Cereb Cortex*  
646 29:2437–2454.
- 647 Champoux F, Paiement P, Mercier C, Lepore F, Lassonde M, Gagné J-P (2007) Auditory processing in a patient with a  
648 unilateral lesion of the inferior colliculus: Role of the inferior colliculus in humans. *Eur J Neurosci* 25:291–297.
- 649 Chen C, Cheng M, Ito T, Song S (2018) Neuronal Organization in the Inferior Colliculus Revisited with Cell-Type-  
650 Dependent Monosynaptic Tracing. *J Neurosci* 38:3318–3332.
- 651 Clements JD, Lester RA, Tong G, Jahr CE, Westbrook GL (1992) The time course of glutamate in the synaptic cleft.  
652 *Science* 258:1498–1501.
- 653 Coomes DL, Schofield BR (2004) Projections from the auditory cortex to the superior olivary complex in guinea pigs.  
654 *Eur J Neurosci* 19:2188–2200.
- 655 Destexhe A, Rudolph M, Paré D (2003) The high-conductance state of neocortical neurons in vivo. *Nat Rev Neurosci*  
656 4:739–751.
- 657 Diamond IT, Jones EG, Powell TPS (1969) The projection of the auditory cortex upon the diencephalon and brain stem  
658 in the cat. *Brain Res* 15:305–340.
- 659 Doucet JR, Molavi DL, Ryugo DK (2003) The source of corticocollicular and corticobulbar projections in area Te1 of the  
660 rat. *Exp Brain Res* 153:461–466.
- 661 Faye-Lund H, Osen KK (1985) Anatomy of the inferior colliculus in rat. *Anat Embryol (Berl)* 171:1–20.
- 662 Feldman DE, Brainard MS, Knudsen EI (1996) Newly learned auditory responses mediated by NMDA receptors in the  
663 owl inferior colliculus. *Science* 271:525–528.
- 664 Gasparini S, Magee JC (2006) State-dependent dendritic computation in hippocampal CA1 pyramidal neurons. *J*  
665 *Neurosci Off J Soc Neurosci* 26:2088–2100.
- 666 Geis H-RAP, van der Heijden M, Borst JGG (2011) Subcortical input heterogeneity in the mouse inferior colliculus. *J*  
667 *Physiol* 589:3955–3967.
- 668 Gottlieb Y, Vaadia E, Abeles M (1989) Single unit activity in the auditory cortex of a monkey performing a short term  
669 memory task. *Exp Brain Res* 74:139–148.
- 670 Goyer D, Silveira MA, George AP, Beebe NL, Edelbrock RM, Malinski PT, Schofield BR, Roberts MT (2019) A novel  
671 class of inferior colliculus principal neurons labeled in vasoactive intestinal peptide-Cre mice. *eLife* 8:e43770.
- 672 Harnett MT, Makara JK, Spruston N, Kath WL, Magee JC (2012) Synaptic amplification by dendritic spines enhances  
673 input cooperativity. *Nature* 491:599–602.
- 674 Huang Y, Matysiak A, Heil P, König R, Brosch M (2016) Persistent neural activity in auditory cortex is related to  
675 auditory working memory in humans and nonhuman primates. *eLife* 5.

- 676 Hurley LM, Pollak GD (2005) Serotonin shifts first-spike latencies of inferior colliculus neurons. *J Neurosci Off J Soc*  
677 *Neurosci* 25:7876–7886.
- 678 Joswig H, Schönerberger U, Brüggel D, Richter H, Surbeck W (2015) Reversible pure word deafness due to inferior  
679 colliculi compression by a pineal germinoma in a young adult. *Clin Neurol Neurosurg* 139:62–65.
- 680 Kerchner GA, Nicoll RA (2008) Silent synapses and the emergence of a postsynaptic mechanism for LTP. *Nat Rev*  
681 *Neurosci* 9:813–825.
- 682 Kitagawa M, Sakaba T (2019) Developmental changes in the excitatory short-term plasticity at input synapses in the rat  
683 inferior colliculus. *Eur J Neurosci* 50:2830–2846.
- 684 Kole MHP, Letzkus JJ, Stuart GJ (2007) Axon initial segment Kv1 channels control axonal action potential waveform  
685 and synaptic efficacy. *Neuron* 55:633–647.
- 686 Kong L, Xiong C, Li L, Yan J (2014) Frequency-specific corticofugal modulation of the dorsal cochlear nucleus in mice.  
687 *Front Syst Neurosci* 8 Available at: <http://journal.frontiersin.org/article/10.3389/fnsys.2014.00125/abstract>  
688 [Accessed November 16, 2020].
- 689 Krishna BS, Semple MN (2000) Auditory Temporal Processing: Responses to Sinusoidally Amplitude-Modulated Tones  
690 in the Inferior Colliculus. *J Neurophysiol* 84:255–273.
- 691 Larkum ME, Nevian T, Sandler M, Polsky A, Schiller J (2009) Synaptic Integration in Tuft Dendrites of Layer 5  
692 Pyramidal Neurons: A New Unifying Principle. *Science* 325:756–760.
- 693 LeDoux J, Farb C, Ruggiero D (1990) Topographic organization of neurons in the acoustic thalamus that project to the  
694 amygdala. *J Neurosci* 10:1043–1054.
- 695 Lefort S, Tómm C, Floyd Sarria J-C, Petersen CCH (2009) The excitatory neuronal network of the C2 barrel column in  
696 mouse primary somatosensory cortex. *Neuron* 61:301–316.
- 697 Lesicko AMH, Hristova TS, Maigler KC, Llano DA (2016) Connectional Modularity of Top-Down and Bottom-Up  
698 Multimodal Inputs to the Lateral Cortex of the Mouse Inferior Colliculus. *J Neurosci* 36:11037–11050.
- 699 Lester RA, Jahr CE (1992) NMDA channel behavior depends on agonist affinity. *J Neurosci Off J Soc Neurosci*  
700 12:635–643.
- 701 Li Y, Evans MS, Faingold CL (1998) In vitro electrophysiology of neurons in subnuclei of rat inferior colliculus. *Hear Res*  
702 121:1–10.
- 703 Llano DA, Slater BJ, Lesicko AMH, Stebbings KA (2014) An auditory colliculothalamocortical brain slice preparation in  
704 mouse. *J Neurophysiol* 111:197–207.
- 705 Loftus WC, Malmierca MS, Bishop DC, Oliver DL (2008) The cytoarchitecture of the inferior colliculus revisited: A  
706 common organization of the lateral cortex in rat and cat. *Neuroscience* 154:196–205.
- 707 Losonczy A, Magee JC (2006) Integrative properties of radial oblique dendrites in hippocampal CA1 pyramidal  
708 neurons. *Neuron* 50:291–307.
- 709 Lumani A, Zhang H (2010) Responses of neurons in the rat's dorsal cortex of the inferior colliculus to monaural tone  
710 bursts. *Brain Res* 1351:115–129.
- 711 Ma CL, Kelly JB, Wu SH (2002) AMPA and NMDA receptors mediate synaptic excitation in the rat's inferior colliculus.  
712 *Hear Res* 168:25–34.
- 713 Markram H, Wang Y, Tsodyks M (1998) Differential signaling via the same axon of neocortical pyramidal neurons. *Proc*  
714 *Natl Acad Sci U S A* 95:5323–5328.
- 715 Massopust LC, Ordly JM (1962) Auditory organization of the inferior colliculi in the cat. *Exp Neurol* 6:465–477.

- 716 Masterton RB, Jane JA, Diamond IT (1968) Role of brain-stem auditory structures in sound localization. II. Inferior  
717 colliculus and its brachium. *J Neurophysiol* 31:96–108.
- 718 Mellott JG, Foster NL, Ohi AP, Schofield BR (2014) Excitatory and inhibitory projections in parallel pathways from the  
719 inferior colliculus to the auditory thalamus. *Front Neuroanat* 8 Available at:  
720 <http://journal.frontiersin.org/article/10.3389/fnana.2014.00124/abstract> [Accessed July 24, 2020].
- 721 Mitani A, Shimokouchi M, Nomura S (1983) Effects of stimulation of the primary auditory cortex upon  
722 colliculogeniculate neurons in the inferior colliculus of the cat. *Neurosci Lett* 42:185–189.
- 723 Moore LA, Trussell LO (2017) Corelease of Inhibitory Neurotransmitters in the Mouse Auditory Midbrain. *J Neurosci Off*  
724 *J Soc Neurosci* 37:9453–9464.
- 725 Morris RG, Anderson E, Lynch GS, Baudry M (1986) Selective impairment of learning and blockade of long-term  
726 potentiation by an N-methyl-D-aspartate receptor antagonist, AP5. *Nature* 319:774–776.
- 727 Nakamoto KT, Jones SJ, Palmer AR (2008) Descending projections from auditory cortex modulate sensitivity in the  
728 midbrain to cues for spatial position. *J Neurophysiol* 99:2347–2356.
- 729 Nakamoto KT, Shackleton TM, Palmer AR (2010) Responses in the inferior colliculus of the guinea pig to concurrent  
730 harmonic series and the effect of inactivation of descending controls. *J Neurophysiol* 103:2050–2061.
- 731 Naumov V, Heyd J, de Arnal F, Koch U (2019) Analysis of excitatory and inhibitory neuron types in the inferior  
732 colliculus based on  $I_h$  properties. *J Neurophysiol* 121:2126–2139.
- 733 Oliver DL (1984) Neuron types in the central nucleus of the inferior colliculus that project to the medial geniculate body.  
734 *Neuroscience* 11:409–424.
- 735 Oliver DL, Hall WC (1978) The medial geniculate body of the tree shrew, *Tupaia glis* I. Cytoarchitecture and midbrain  
736 connections. *J Comp Neurol* 182:423–458.
- 737 Peña JL, Konishi M (2001) Auditory spatial receptive fields created by multiplication. *Science* 292:249–252.
- 738 Pena JL, Konishi M (2002) From postsynaptic potentials to spikes in the genesis of auditory spatial receptive fields. *J*  
739 *Neurosci Off J Soc Neurosci* 22:5652–5658.
- 740 Peruzzi D, Sivaramakrishnan S, Oliver DL (2000) Identification of cell types in brain slices of the inferior colliculus.  
741 *Neuroscience* 101:403–416.
- 742 Polsky A, Mel B, Schiller J (2009) Encoding and decoding bursts by NMDA spikes in basal dendrites of layer 5  
743 pyramidal neurons. *J Neurosci Off J Soc Neurosci* 29:11891–11903.
- 744 Ponvert ND, Jaramillo S (2019) Auditory Thalamostriatal and Corticostriatal Pathways Convey Complementary  
745 Information about Sound Features. *J Neurosci* 39:271–280.
- 746 Pouille F, Scanziani M (2004) Routing of spike series by dynamic circuits in the hippocampus. *Nature* 429:717–723.
- 747 Qi J, Zhang Z, He N, Liu X, Zhang C, Yan J (2020) Cortical Stimulation Induces Excitatory Postsynaptic Potentials of  
748 Inferior Colliculus Neurons in a Frequency-Specific Manner. *Front Neural Circuits* 14:591986.
- 749 Ranganathan GN, Apostolides PF, Harnett MT, Xu N-L, Druckmann S, Magee JC (2018) Active dendritic integration  
750 and mixed neocortical network representations during an adaptive sensing behavior. *Nat Neurosci* 21:1583–  
751 1590.
- 752 Ruediger S, Scanziani M (2020) Learning speed and detection sensitivity controlled by distinct cortico-fugal neurons in  
753 visual cortex. *eLife* 9.
- 754 Ryugo DK, Weinberger NM (1976) Corticofugal modulation of the medial geniculate body. *Exp Neurol* 51:377–391.



- 755 Sakurai Y (1990) Cells in the rat auditory system have sensory-delay correlates during the performance of an auditory  
756 working memory task. *Behav Neurosci* 104:856–868.
- 757 Saldaña E, Feliciano M, Mugnaini E (1996) Distribution of descending projections from primary auditory neocortex to  
758 inferior colliculus mimics the topography of intracollicular projections. *J Comp Neurol* 371:15–40.
- 759 Saldaña E, Merchán MA (1992) Intrinsic and commissural connections of the rat inferior colliculus. *J Comp Neurol*  
760 319:417–437.
- 761 Schofield BR, Coomes DL, Schofield RM (2006) Cells in Auditory Cortex that Project to the Cochlear Nucleus in  
762 Guinea Pigs. *J Assoc Res Otolaryngol* 7:95–109.
- 763 Schwartz EJ, Rothman JS, Dugué GP, Diana M, Rousseau C, Silver RA, Dieudonné S (2012) NMDA receptors with  
764 incomplete Mg<sup>2+</sup> block enable low-frequency transmission through the cerebellar cortex. *J Neurosci Off J Soc*  
765 *Neurosci* 32:6878–6893.
- 766 Silveira MA, Anair JD, Beebe NL, Mirjalili P, Schofield BR, Roberts MT (2020) Neuropeptide Y Expression Defines a  
767 Novel Class of GABAergic Projection Neuron in the Inferior Colliculus. *J Neurosci* 40:4685–4699.
- 768 Sinex DG, Li H (2007) Responses of Inferior Colliculus Neurons to Double Harmonic Tones. *J Neurophysiol* 98:3171–  
769 3184.
- 770 Sivaramakrishnan S, Oliver DL (2001) Distinct K currents result in physiologically distinct cell types in the inferior  
771 colliculus of the rat. *J Neurosci Off J Soc Neurosci* 21:2861–2877.
- 772 Smith PH (1992) Anatomy and physiology of multipolar cells in the rat inferior collicular cortex using the in vitro brain  
773 slice technique. *J Neurosci Off J Soc Neurosci* 12:3700–3715.
- 774 Song JH, Lucaci D, Calangiu I, Brown MTC, Park JS, Kim J, Brickley SG, Chadderton P (2018) Combining mGRASP  
775 and Optogenetics Enables High-Resolution Functional Mapping of Descending Cortical Projections. *Cell Rep*  
776 24:1071–1080.
- 777 Stebbings KA, Lesicko AMH, Llano DA (2014) The auditory corticocollicular system: Molecular and circuit-level  
778 considerations. *Hear Res* 314:51–59.
- 779 Stuart GJ, Spruston N (2015) Dendritic integration: 60 years of progress. *Nat Neurosci* 18:1713–1721.
- 780 Sun H, Wu SH (2008) Modification of membrane excitability of neurons in the rat's dorsal cortex of the inferior colliculus  
781 by preceding hyperpolarization. *Neuroscience* 154:257–272.
- 782 Sun H, Wu SH (2009) The physiological role of pre- and postsynaptic GABA(B) receptors in membrane excitability and  
783 synaptic transmission of neurons in the rat's dorsal cortex of the inferior colliculus. *Neuroscience* 160:198–211.
- 784 Suthakar K, Ryugo DK (2017) Descending projections from the inferior colliculus to medial olivocochlear efferents: Mice  
785 with normal hearing, early onset hearing loss, and congenital deafness. *Hear Res* 343:34–49.
- 786 Syka J, Popelár J, Kvasnák E, Astl J (2000) Response properties of neurons in the central nucleus and external and  
787 dorsal cortices of the inferior colliculus in guinea pig. *Exp Brain Res* 133:254–266.
- 788 Takahashi H, Magee JC (2009) Pathway interactions and synaptic plasticity in the dendritic tuft regions of CA1  
789 pyramidal neurons. *Neuron* 62:102–111.
- 790 Vila C-H, Williamson RS, Hancock KE, Polley DB (2019) Optimizing optogenetic stimulation protocols in auditory  
791 corticofugal neurons based on closed-loop spike feedback. *J Neural Eng* 16:066023.
- 792 Weible AP, Yavorska I, Wehr M (2020) A Cortico-Collicular Amplification Mechanism for Gap Detection. *Cereb Cortex*  
793 N Y N 1991 30:3590–3607.
- 794 Williamson RS, Polley DB (2019) Parallel pathways for sound processing and functional connectivity among layer 5  
795 and 6 auditory corticofugal neurons. *eLife* 8:e42974.

- 796 Winer JA (2006) Decoding the auditory corticofugal systems. *Hear Res* 212:1–8.
- 797 Winer JA, Diehl JJ, Larue DT (2001) Projections of auditory cortex to the medial geniculate body of the cat. *J Comp*  
798 *Neurol* 430:27–55.
- 799 Winer JA, Larue DT, Diehl JJ, Hefti BJ (1998) Auditory cortical projections to the cat inferior colliculus. *J Comp Neurol*  
800 400:147–174.
- 801 Wong AB, Borst JGG (2019) Tonotopic and non-auditory organization of the mouse dorsal inferior colliculus revealed  
802 by two-photon imaging. *eLife* 8:e49091.
- 803 Wu SH (2004) Contribution of AMPA, NMDA, and GABAA Receptors to Temporal Pattern of Postsynaptic Responses  
804 in the Inferior Colliculus of the Rat. *J Neurosci* 24:4625–4634.
- 805 Xiao Z, Suga N (2002) Modulation of cochlear hair cells by the auditory cortex in the mustached bat. *Nat Neurosci*  
806 5:57–63.
- 807 Xiong XR, Liang F, Zingg B, Ji X, Ibrahim LA, Tao HW, Zhang LI (2015) Auditory cortex controls sound-driven innate  
808 defense behaviour through corticofugal projections to inferior colliculus. *Nat Commun* 6:7224.
- 809 Yan J, Suga N (1999) Corticofugal Amplification of Facilitative Auditory Responses of Subcortical Combination-  
810 Sensitive Neurons in the Mustached Bat. *J Neurophysiol* 81:817–824.
- 811 Yan W, Suga N (1998) Corticofugal modulation of the midbrain frequency map in the bat auditory system. *Nat Neurosci*  
812 1:54–58.
- 813 Yu Y-Q, Xiong Y, Chan Y-S, He J (2004) Corticofugal gating of auditory information in the thalamus: an in vivo  
814 intracellular recording study. *J Neurosci Off J Soc Neurosci* 24:3060–3069.
- 815 Zucker RS, Regehr WG (2002) Short-term synaptic plasticity. *Annu Rev Physiol* 64:355–405.
- 816

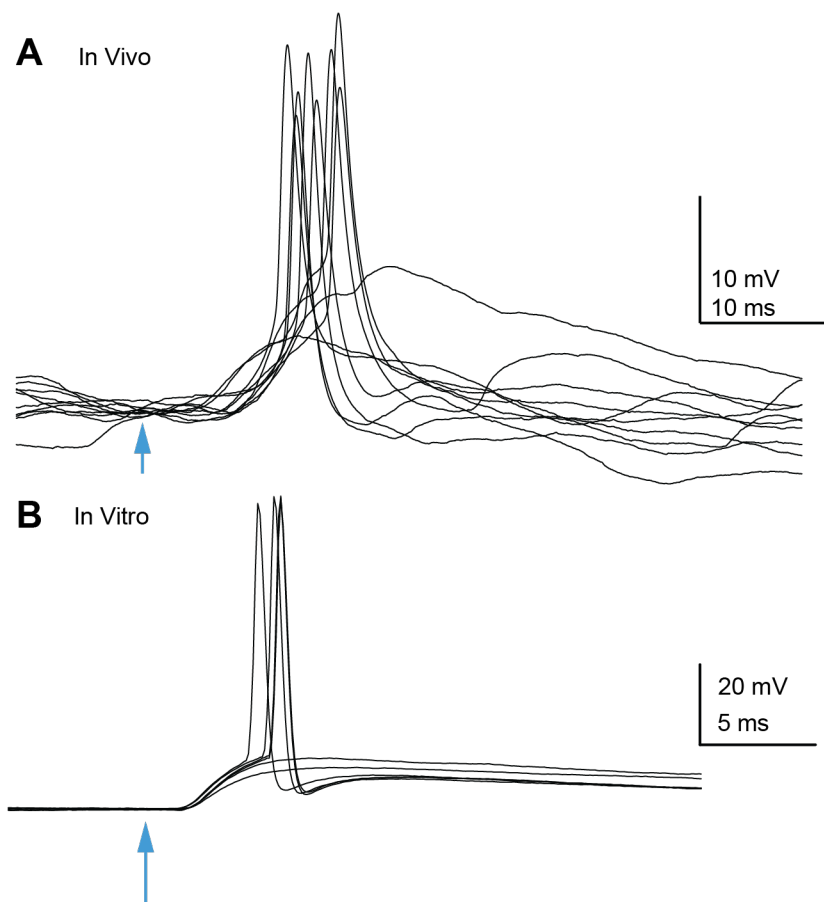

817 Supplemental Figure 1: Auditory cortico-collicular EPSPs can trigger spikes in IC neurons in vivo  
818 and in vitro.

819 **A)** Example overlaid trials from an *in vivo* whole-cell recording of a superficial IC neuron.

820 Optogenetic stimulation of auditory cortex denoted by arrowhead.

821 **B)** Example trials from an *in vitro* recording.

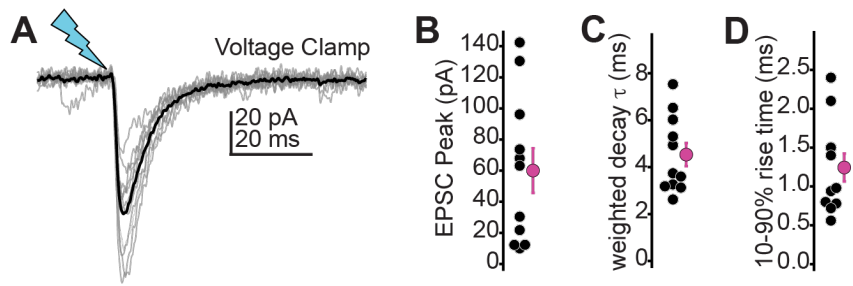

822 Supplemental Figure 2: *Auditory Cortico-collicular transmission in voltage-clamp.*

823 **A)** Example EPSCs recorded in voltage clamp. Gray and black traces are individual trials and  
824 average, respectively. **B-D)** Summary data for EPSC peak amplitudes (B), decay time constant (C),  
825 and 10-90% rise time (D) in n=11 cells.

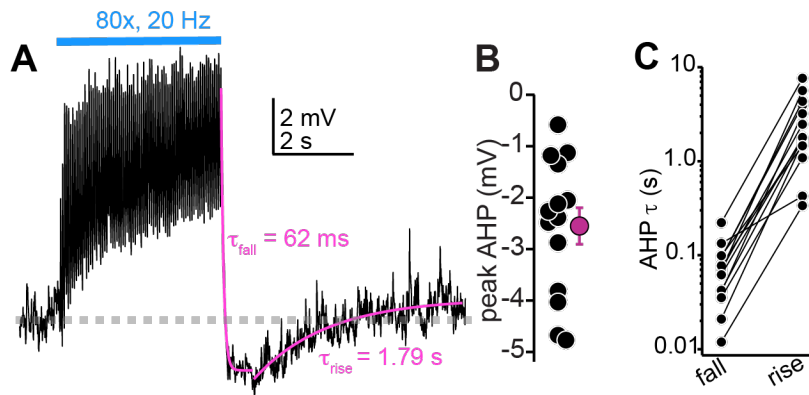

826 Supplemental Figure 3: Large AHPs follow the cessation of auditory cortico-collicular activity in  
827 *vivo*.

828 **A)** Membrane potential (average of multiple trials) during prolonged auditory cortical activity *in vivo*.  
829 Magenta are mono-exponential fits to the membrane potential fall and rise upon cessation of  
830 optogenetic stimulation.

831 **B)** Peak AHP amplitude (relative to baseline Vm) in n=14 cells.

832 **C)** Time constants for the fall and raise of the membrane potential for n = 14 cells. The data are on  
833 a log scale due to the order of magnitude difference in exponent values for fall and rise.

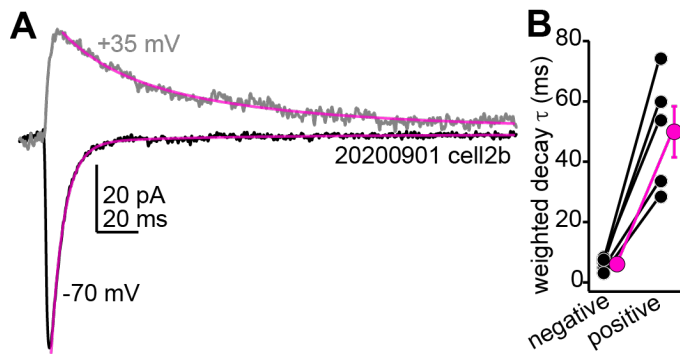

834 Supplemental Figure 4: *Auditory cortico-collicular EPSCs recorded at positive potentials are slower*  
835 *than at negative potentials, consistent with the presence of NMDA receptors.*

836 **A)** Example average EPSCs recorded at negative and positive potentials. Magenta are double  
837 exponential fits to the EPSC decay.

838 **B)** Decay time constant for n=5 cells recorded at positive and negative voltages.
